# Supplementary material
Source: MDPI journal article supplement (https://www.mdpi.com/2220-9964/9/12/735)
Supplement: s1 [file s1]

Archive with 11 entries (11 files):
- Appendix A/Figure A1.png
- Appendix A/Figure A2.png
- Appendix A/Figure A3.png
- Appendix A/Figure A4.png
- Supplementary Information/Supplementary Information S1.pdf
- Supplementary Information/Supplementary Information S2.pdf
- Supplementary Information/Supplementary Information S3.pdf
- Supplementary Information/Supplementary Information S4.pdf
- Supplementary Information/Supplementary Information S5.pdf
- Supplementary Information/Supplementary Information S6.pdf
- Supplementary Information/Supplementary Information S7.pdf
