# Supplementary material
Source: MDPI journal article supplement (https://www.mdpi.com/2220-9964/9/12/735)
Supplement: s1 [file s1 › Supplementary Information/Supplementary Information S1.pdf]

**Supplementary information S1** - Herbaria list of the studied physical and virtual collections (*Quercus* L) and consulted databases

**Studied herbaria collections (*Quercus* L.)**

| <b>Herbarium Code</b> | <b>Institution</b>                                                      | <b>Location</b>                         |
|-----------------------|-------------------------------------------------------------------------|-----------------------------------------|
| AVE                   | Universidade de Aveiro                                                  | Portugal. Aveiro.                       |
| BCN                   | University of Barcelona                                                 | Spain. Catalonia. Barcelona             |
| BRESA                 | Polytechnic Institute of Bragança - IPB                                 | Portugal. Bragança.                     |
| COI                   | University of Coimbra                                                   | Portugal. Coimbra.                      |
| HSS                   | Research Centre of "La Orden-Valdesequera"                              | Spain. Extremadura. Mérida.             |
| HVR                   | Universidade de Trás-os-Montes e Alto Douro                             | Portugal. Vila Real.                    |
| L                     | Naturalis                                                               | Netherlands. Leiden.                    |
| LISE                  | Instituto Nacional de Investigação Agrária e Veterinária, I. P. (INIAV) | Portugal. Oeiras.                       |
| LISFA                 |                                                                         |                                         |
| LISI                  | Instituto Superior de Agronomia                                         | Portugal. Lisboa.                       |
| LISU                  | Museu Nacional de História Natural e da Ciência                         | Portugal. Lisboa.                       |
| MA                    | Real Jardín Botánico                                                    | Spain. Madrid.                          |
| P                     | Muséum National d'Histoire Naturelle                                    | France. Paris.                          |
| PO                    | Museu de História Natural e da Ciência da Universidade do Porto         | Portugal. Porto                         |
| SALA                  | Universidad de Salamanca                                                | Spain. Salamanca.                       |
| SANT                  | Universidad de Santiago de Compostela                                   | Spain. Galicia. Santiago de Compostela. |
| UEVH                  | Universidade de Évora                                                   | Portugal. Évora.                        |

### Online herbaria collections (*Quercus*)

| Herbarium Code | Institution                                                                                               | Location             |
|----------------|-----------------------------------------------------------------------------------------------------------|----------------------|
| B              | Botanischer Garten und Botanisches Museum Berlin-Dahlem, Zentraleinrichtung der Freien Universität Berlin | Germany. Berlin.     |
| G              | Conservatoire et Jardin botaniques de la Ville de Genève                                                  | Switzerland. Genève. |
| K              | Royal Botanic Gardens                                                                                     | U.K. England. Kew.   |
| MAIA           | INIA (Instituto Nacional de Investigación y Tecnología Agraria y Alimentaria)                             | Spain. Madrid.       |
| MPU            | Université de Montpellier                                                                                 | France. Montpellier. |

### Online databases

| Name                                                          | Site                                                                  | Reference                      |
|---------------------------------------------------------------|-----------------------------------------------------------------------|--------------------------------|
| ANTHOS: Spanish Plants Information System                     | <a href="http://www.anthos.es/">http://www.anthos.es/</a>             | Castroviejo, <i>et al.</i> [1] |
| Flora-On: Flora de Portugal Interactiva                       | <a href="http://www.flora-on.pt">www.flora-on.pt</a>                  | Pereira, <i>et al.</i> [2]     |
| GBIF Global Biodiversity Information Facility                 | <a href="https://www.gbif.org/">https://www.gbif.org/</a>             | Holstein [3]                   |
| SIVIM: Iberian and Macaronesian Vegetation Information System | <a href="http://www.sivim.info/sivi/">http://www.sivim.info/sivi/</a> | Font, <i>et al.</i> [4]        |

### References

1. Castroviejo, S.; Aedo, C.; Medina, L. Management of floristic information on the Internet: the Anthos solution. *Willdenowia* **2006**, *36*, 127-137.
2. Pereira, A.J.; Francisco, A.; Porto, M. Flora-On: Occurrence data of the vascular flora of mainland Portugal. *PhytoKeys* **2016**, 105.
3. Holstein, J. *GBIF: Global Biodiversity Information Facility*; University of Ulm: 2001.
4. Font, X.; Pérez-García, N.; Biurrun, I.; Fernández-González, F.; Lence, C. The Iberian and Macaronesian Vegetation Information System (SIVIM, [www.sivim.info](http://www.sivim.info)), five years of online vegetation's data publishing. *Plant Sociology* **2012**, *49*, 89-95.
