# Supplementary material
Source: MDPI journal article supplement (https://www.mdpi.com/2220-9964/9/12/735)
Supplement: s1 [file s1 › Supplementary Information/Supplementary Information S2.pdf]

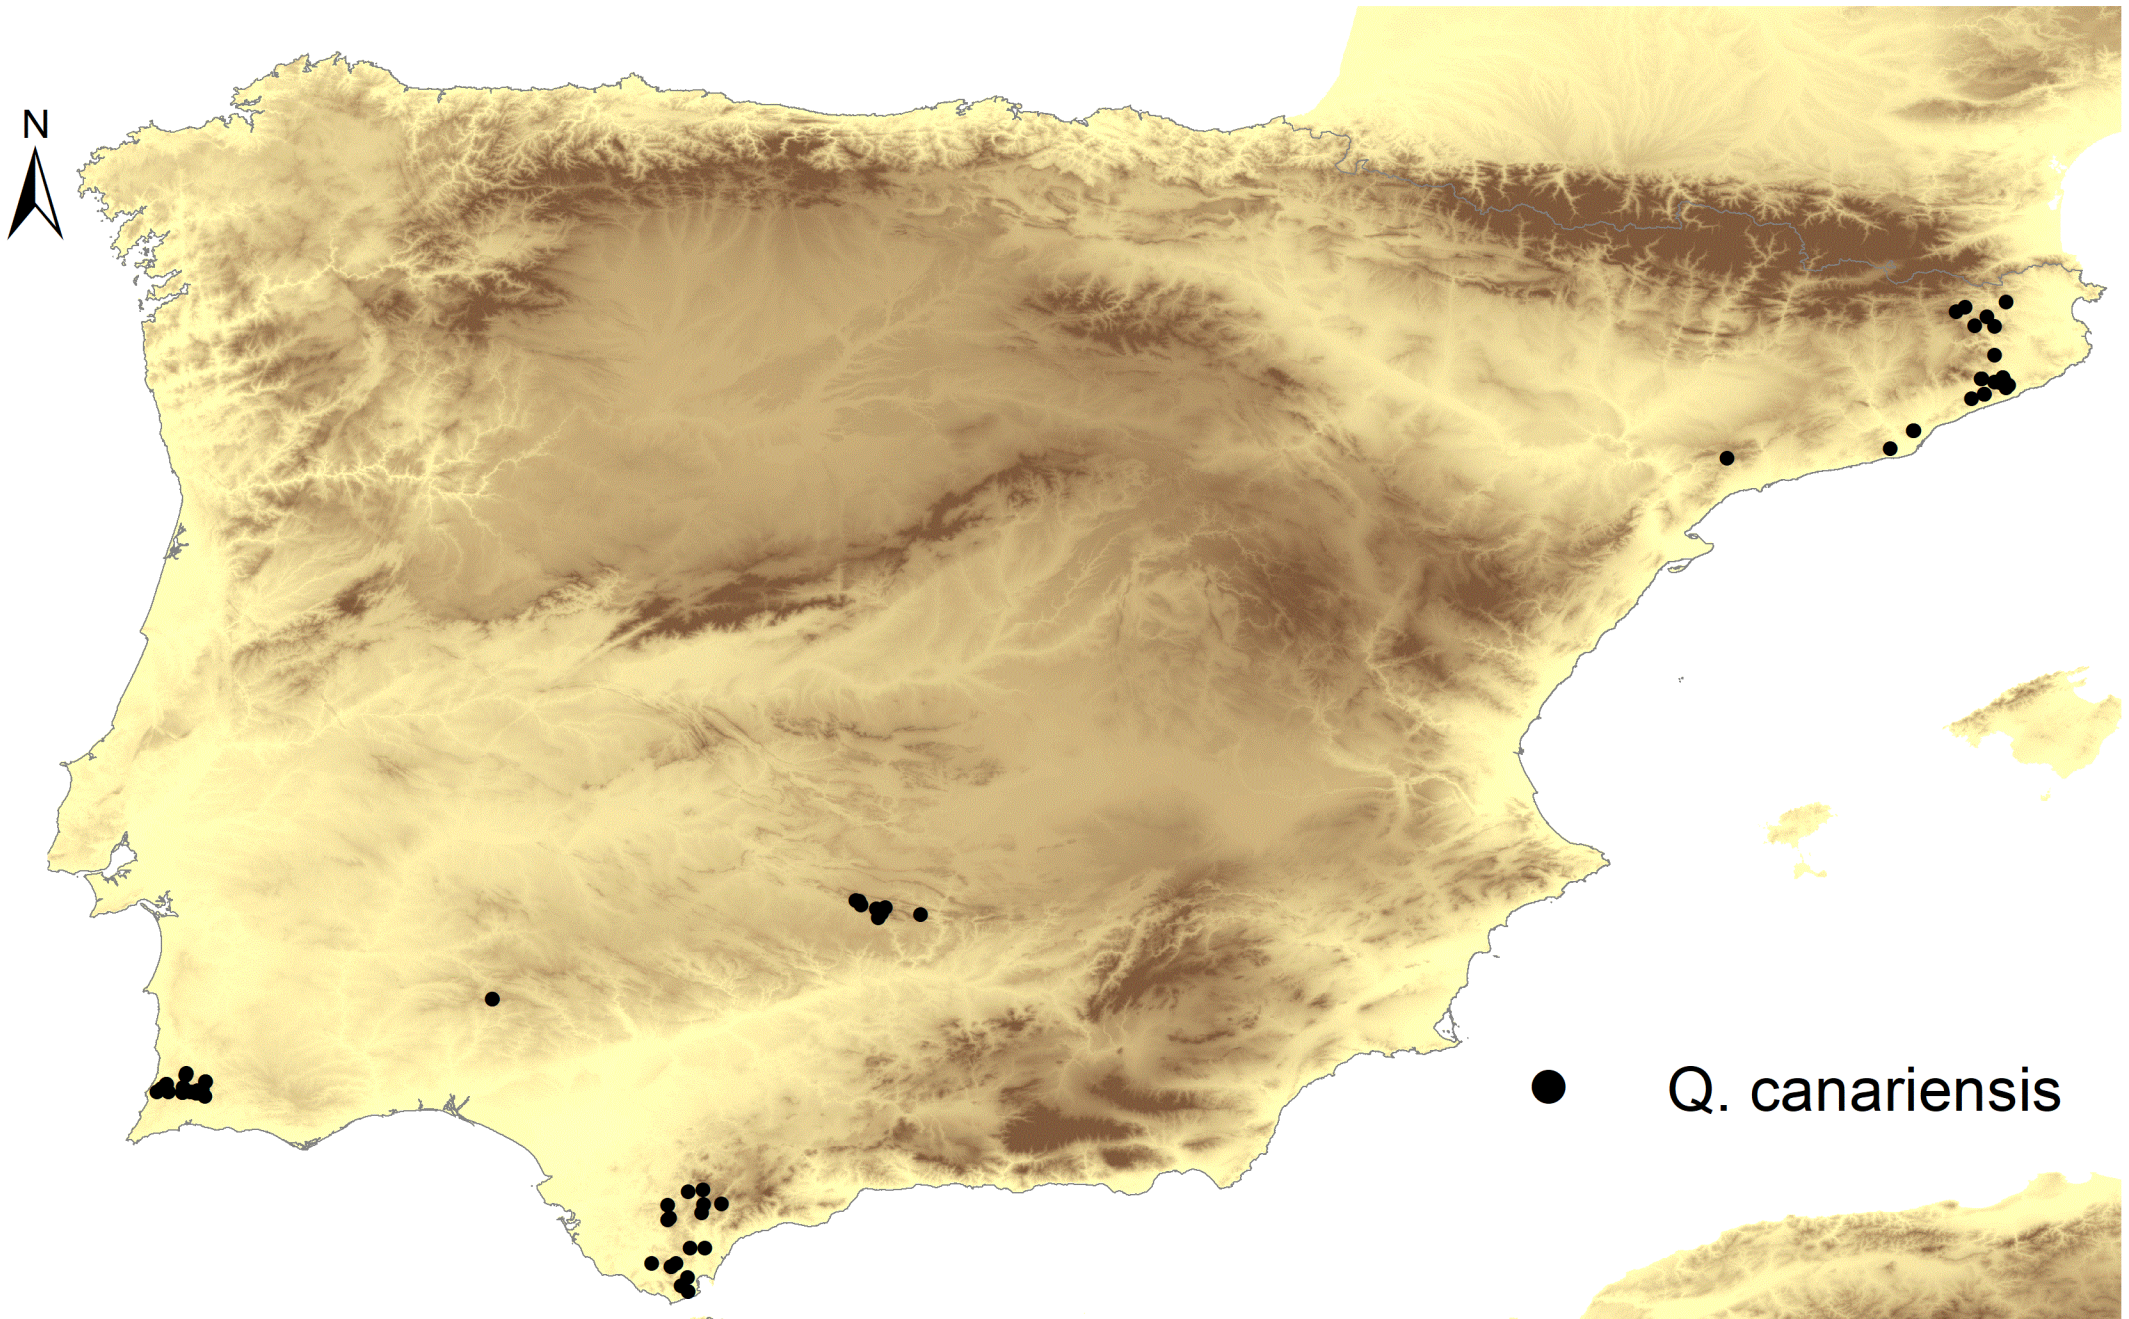

0 100 200 Km

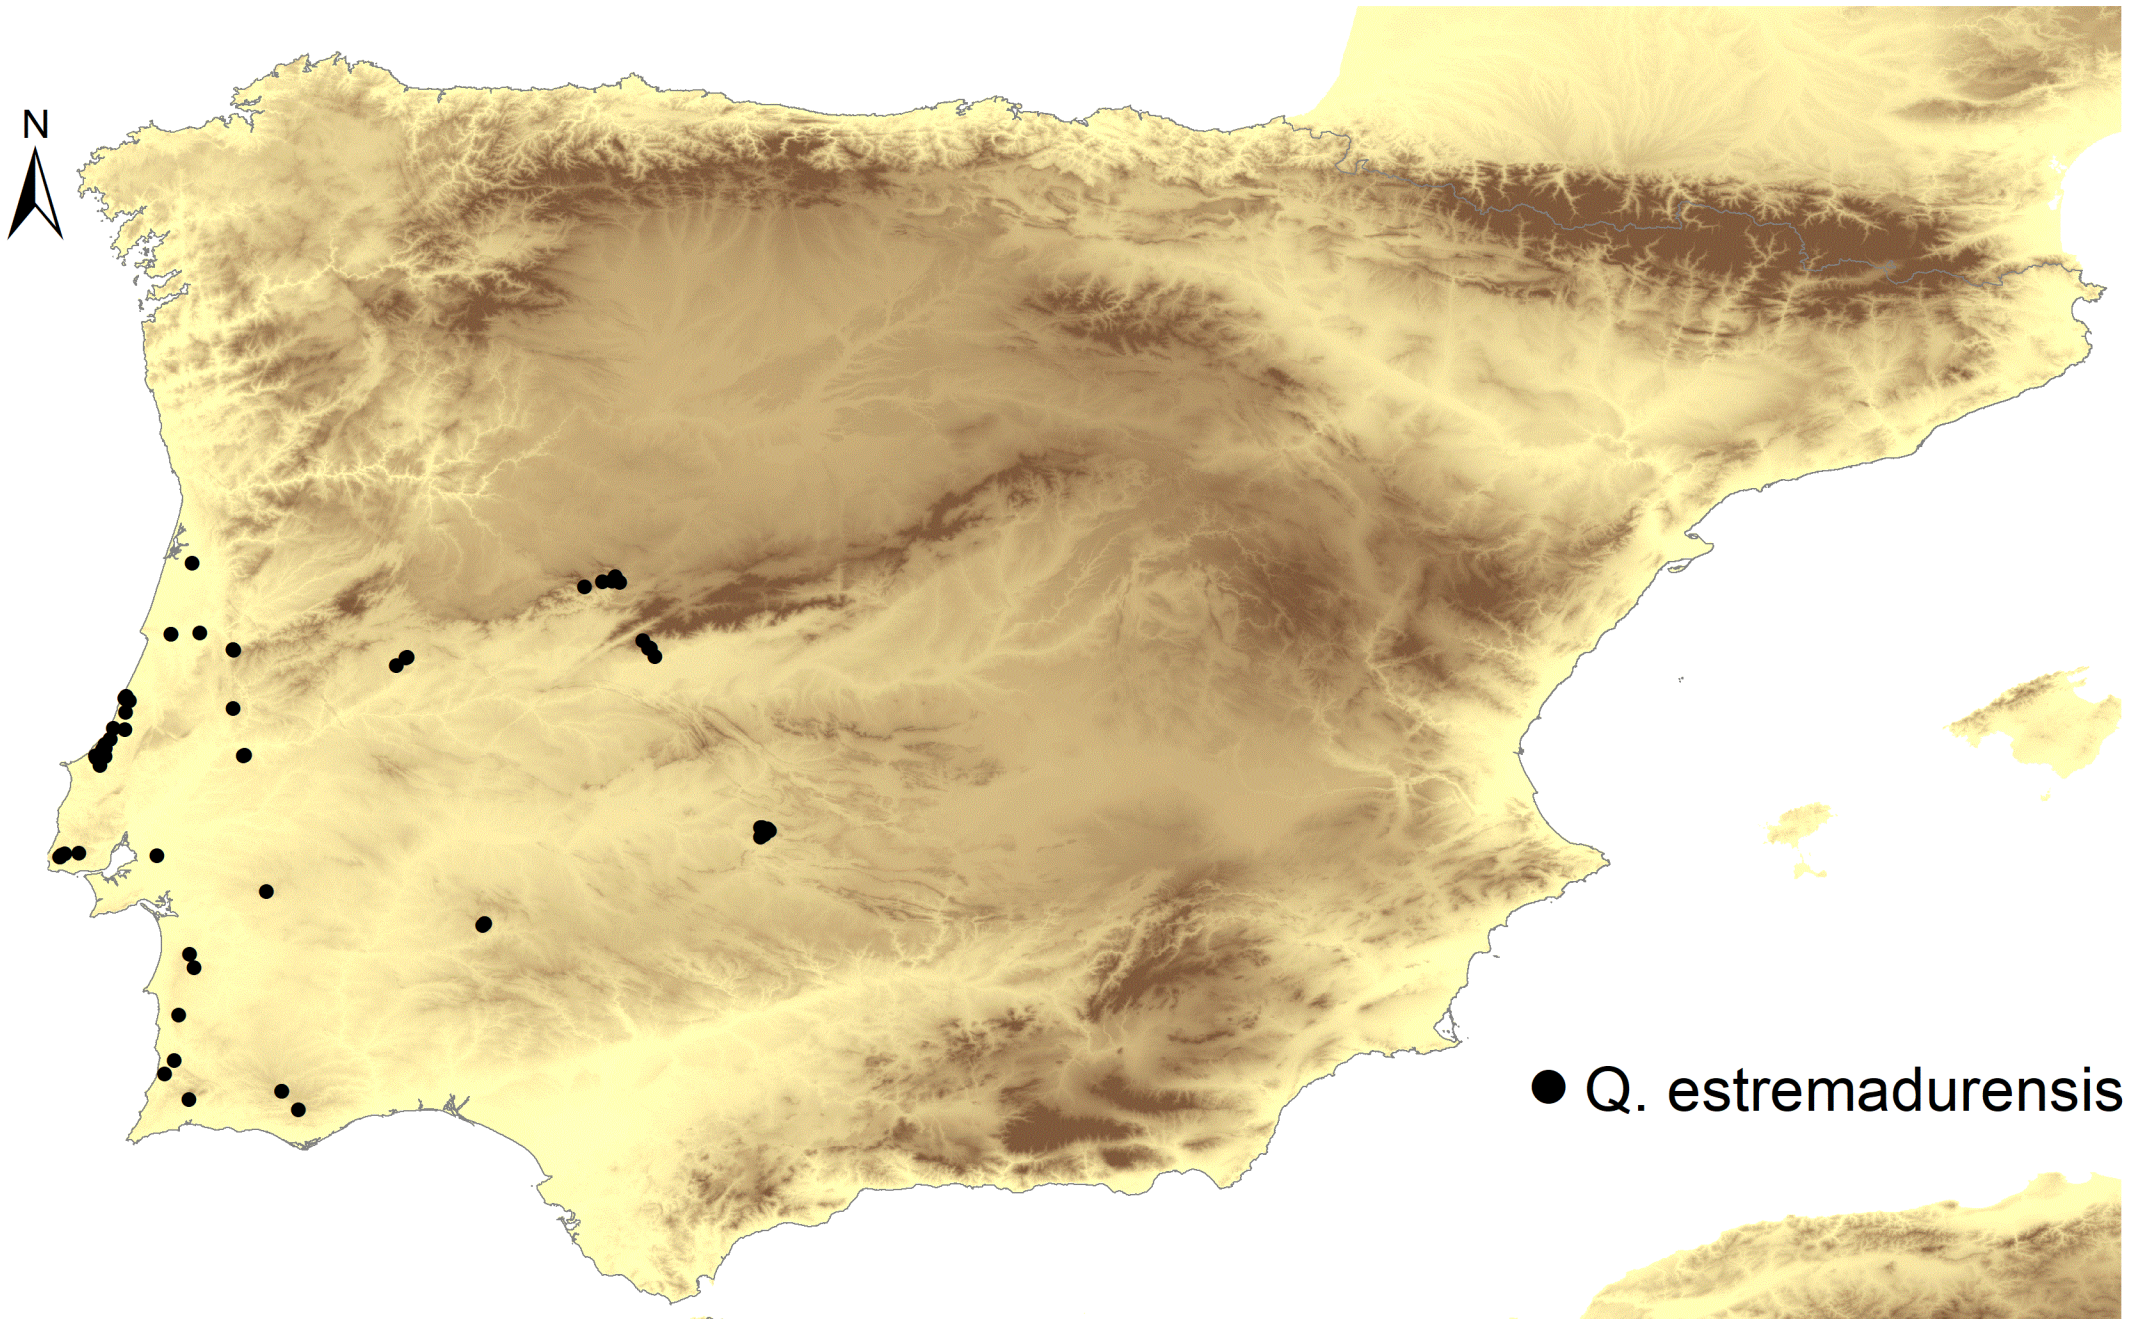

● *Q. estremadurensis*

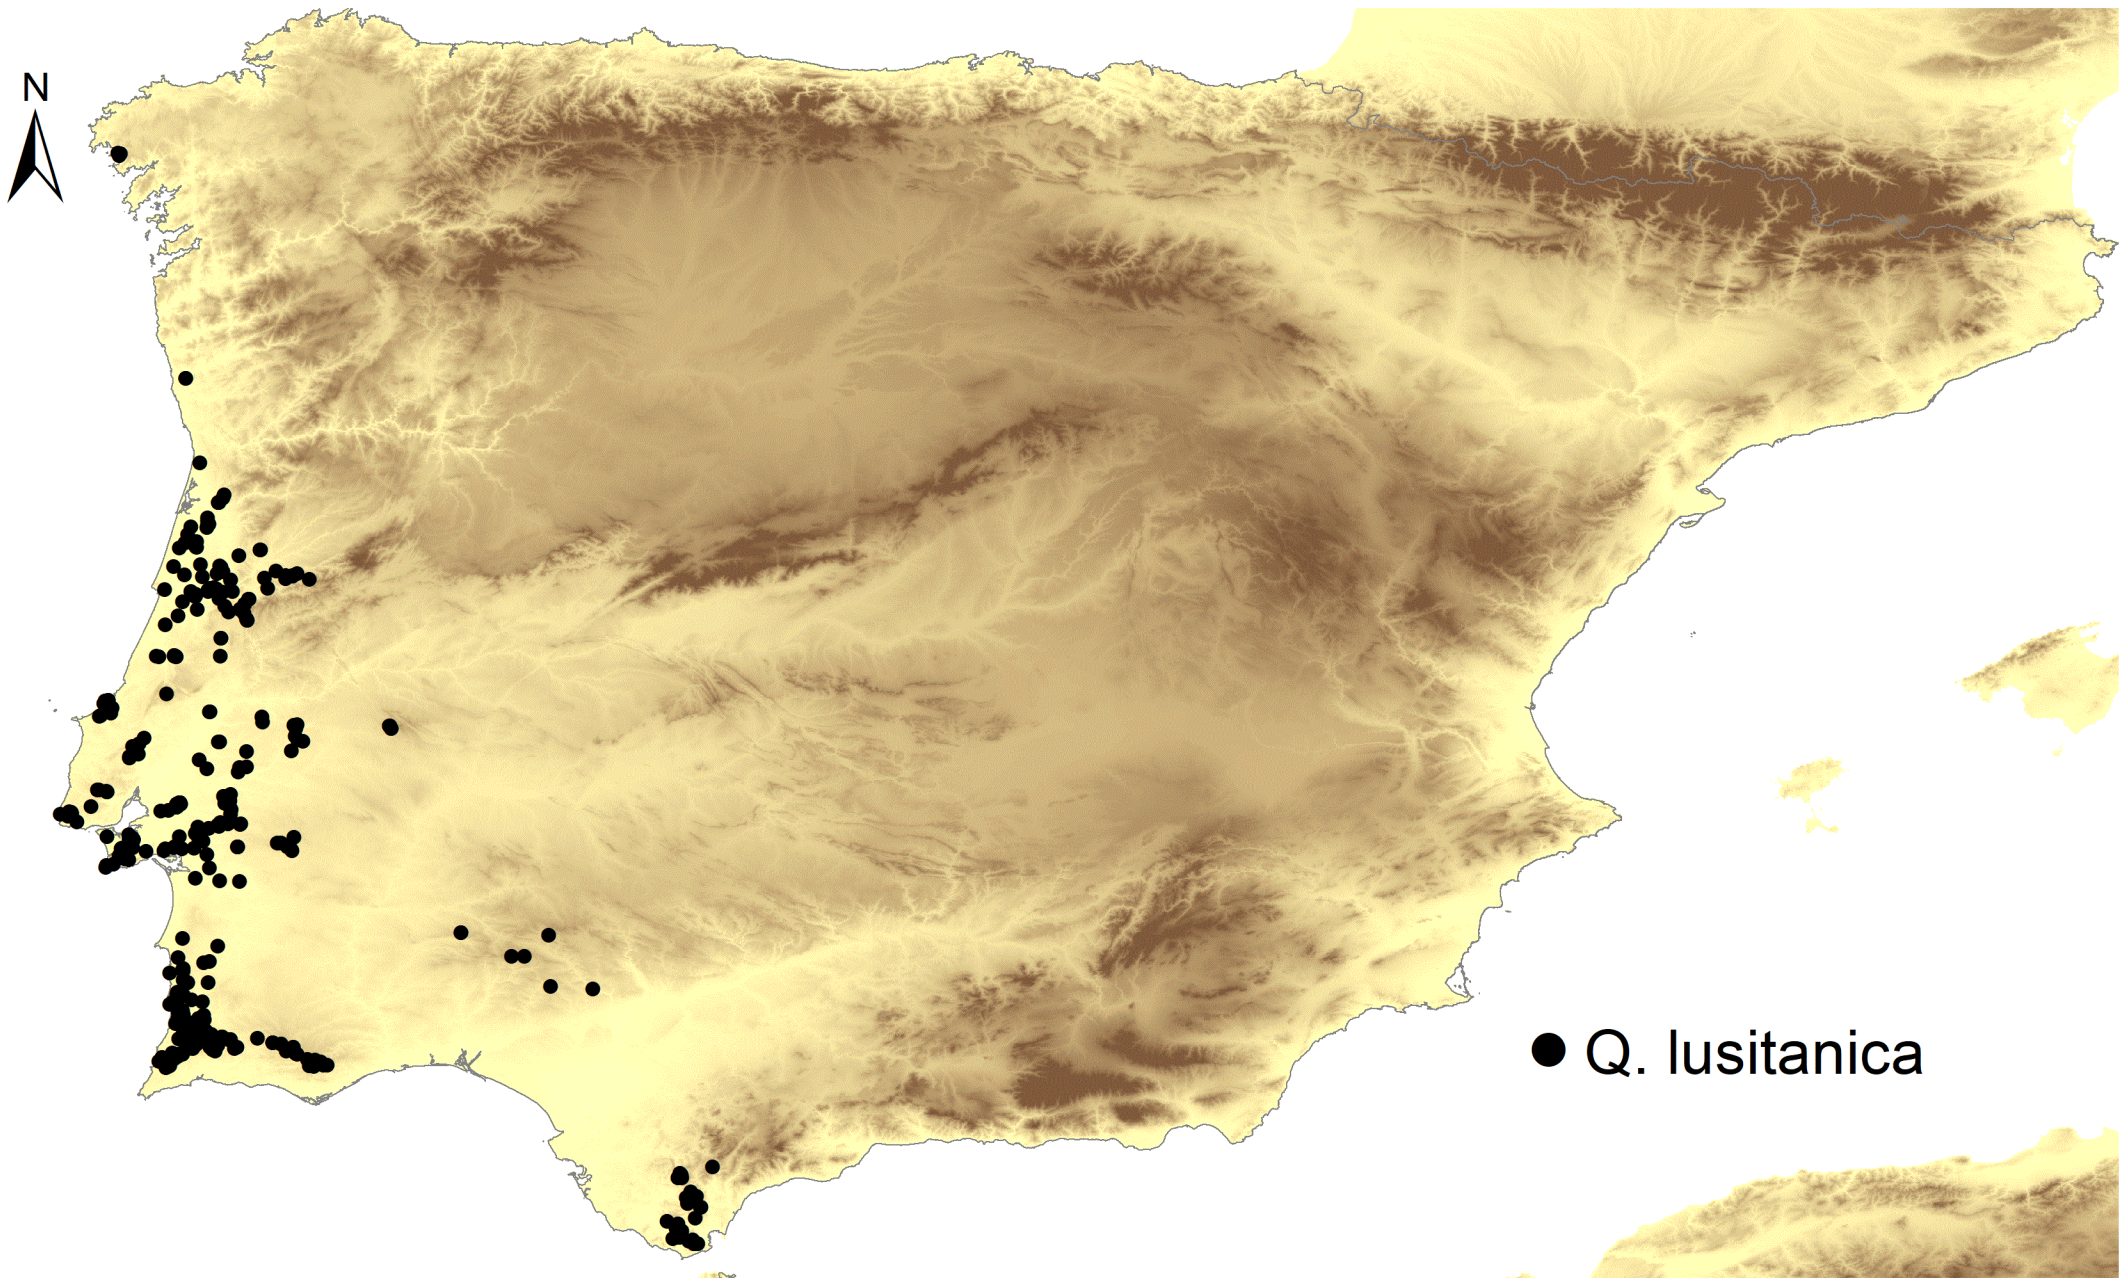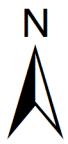

● *Q. lusitanica*

0 100 200 Km

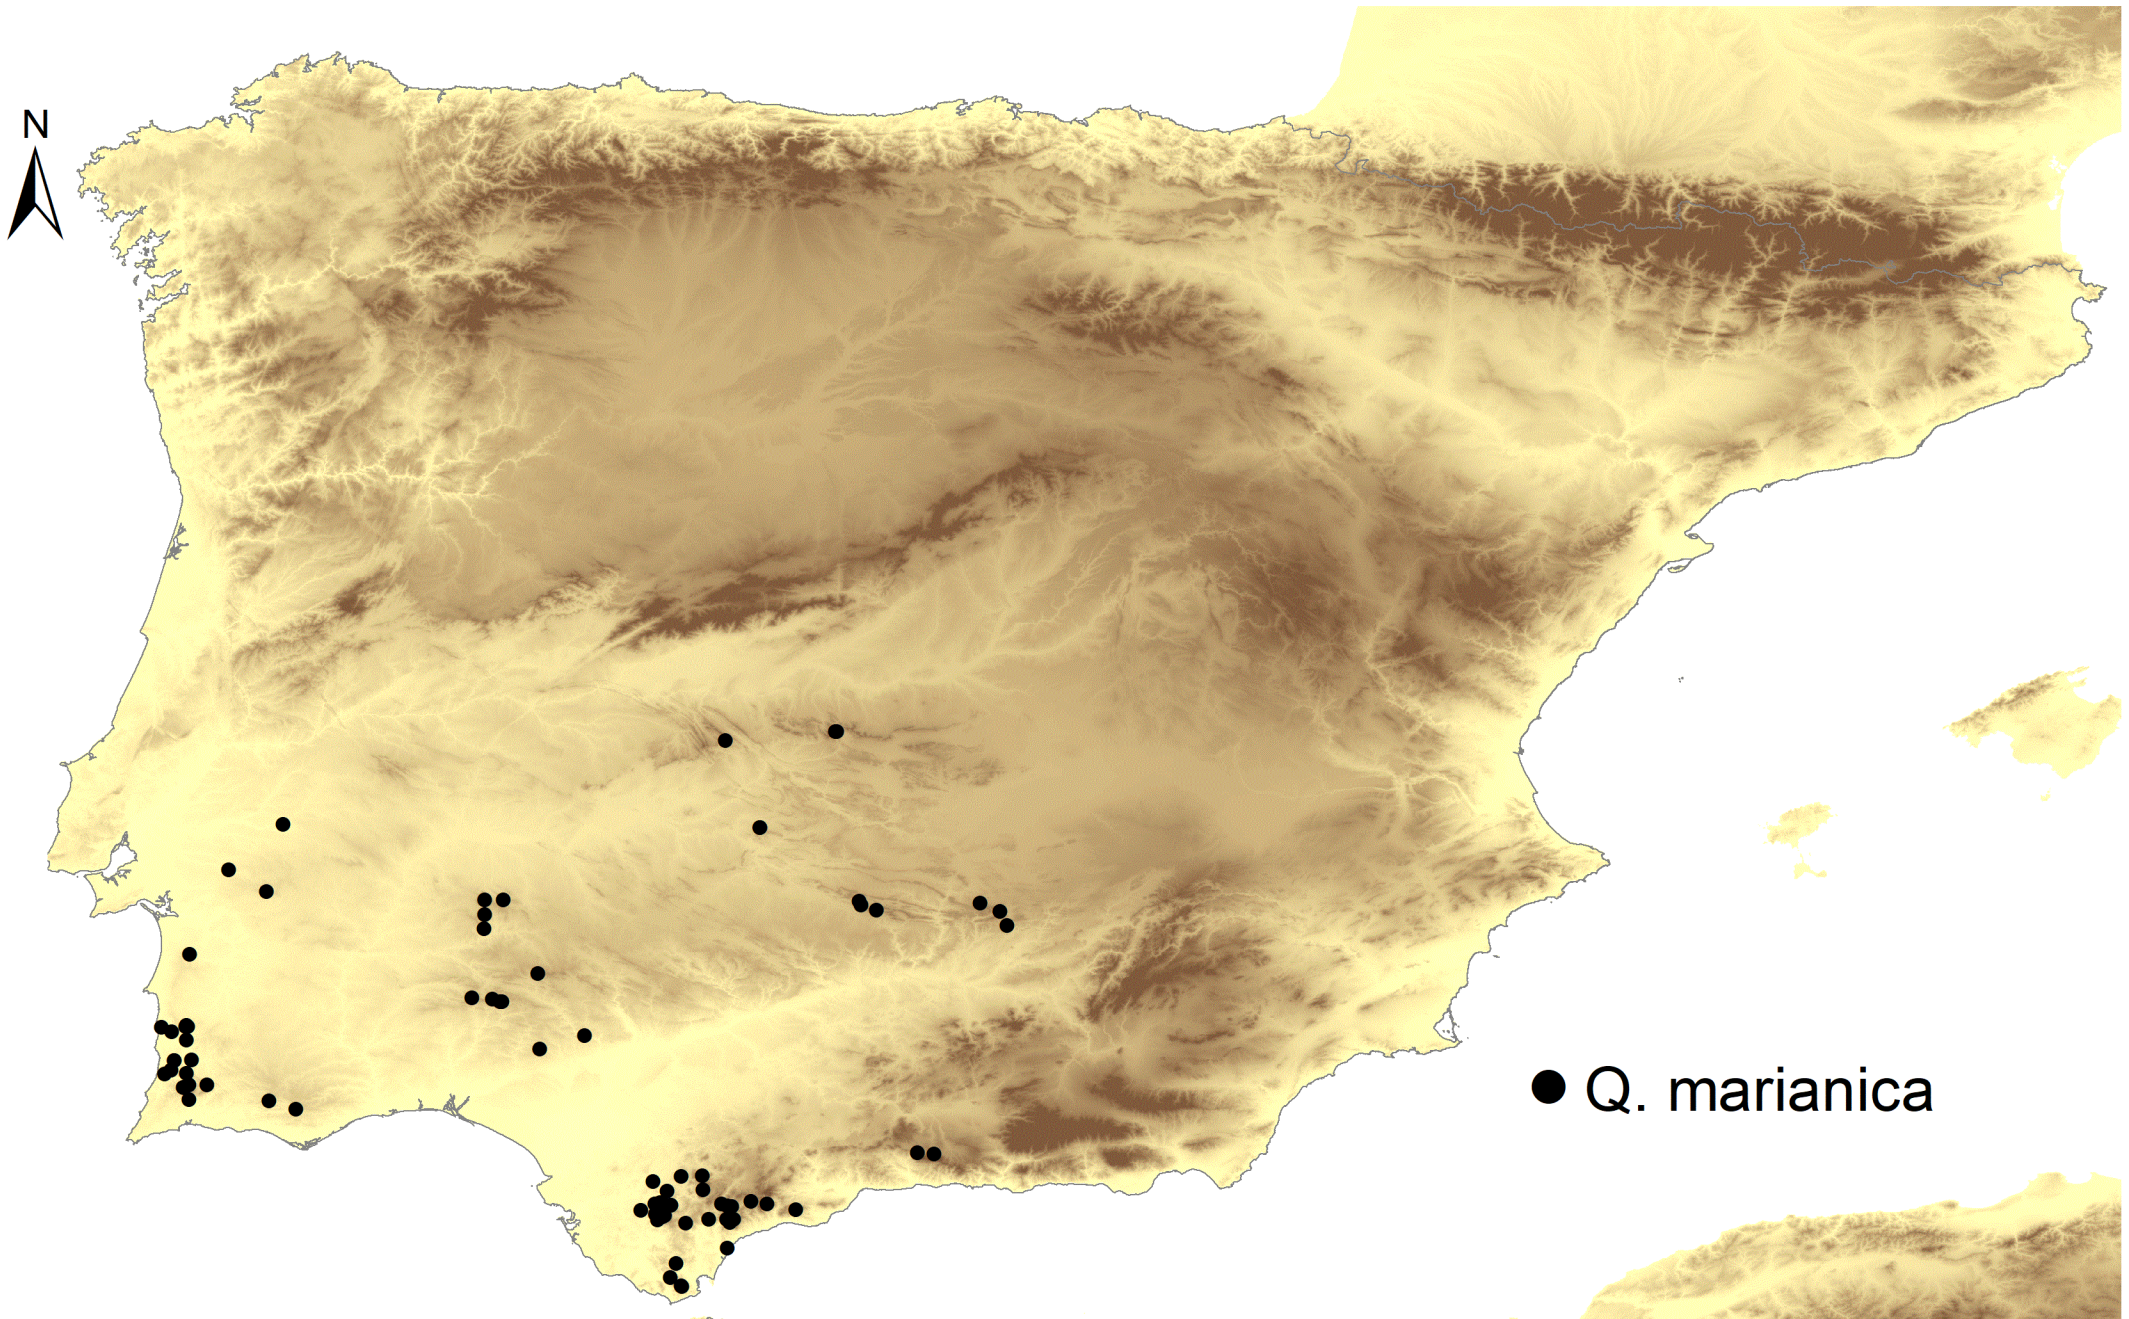

● *Q. marianica*

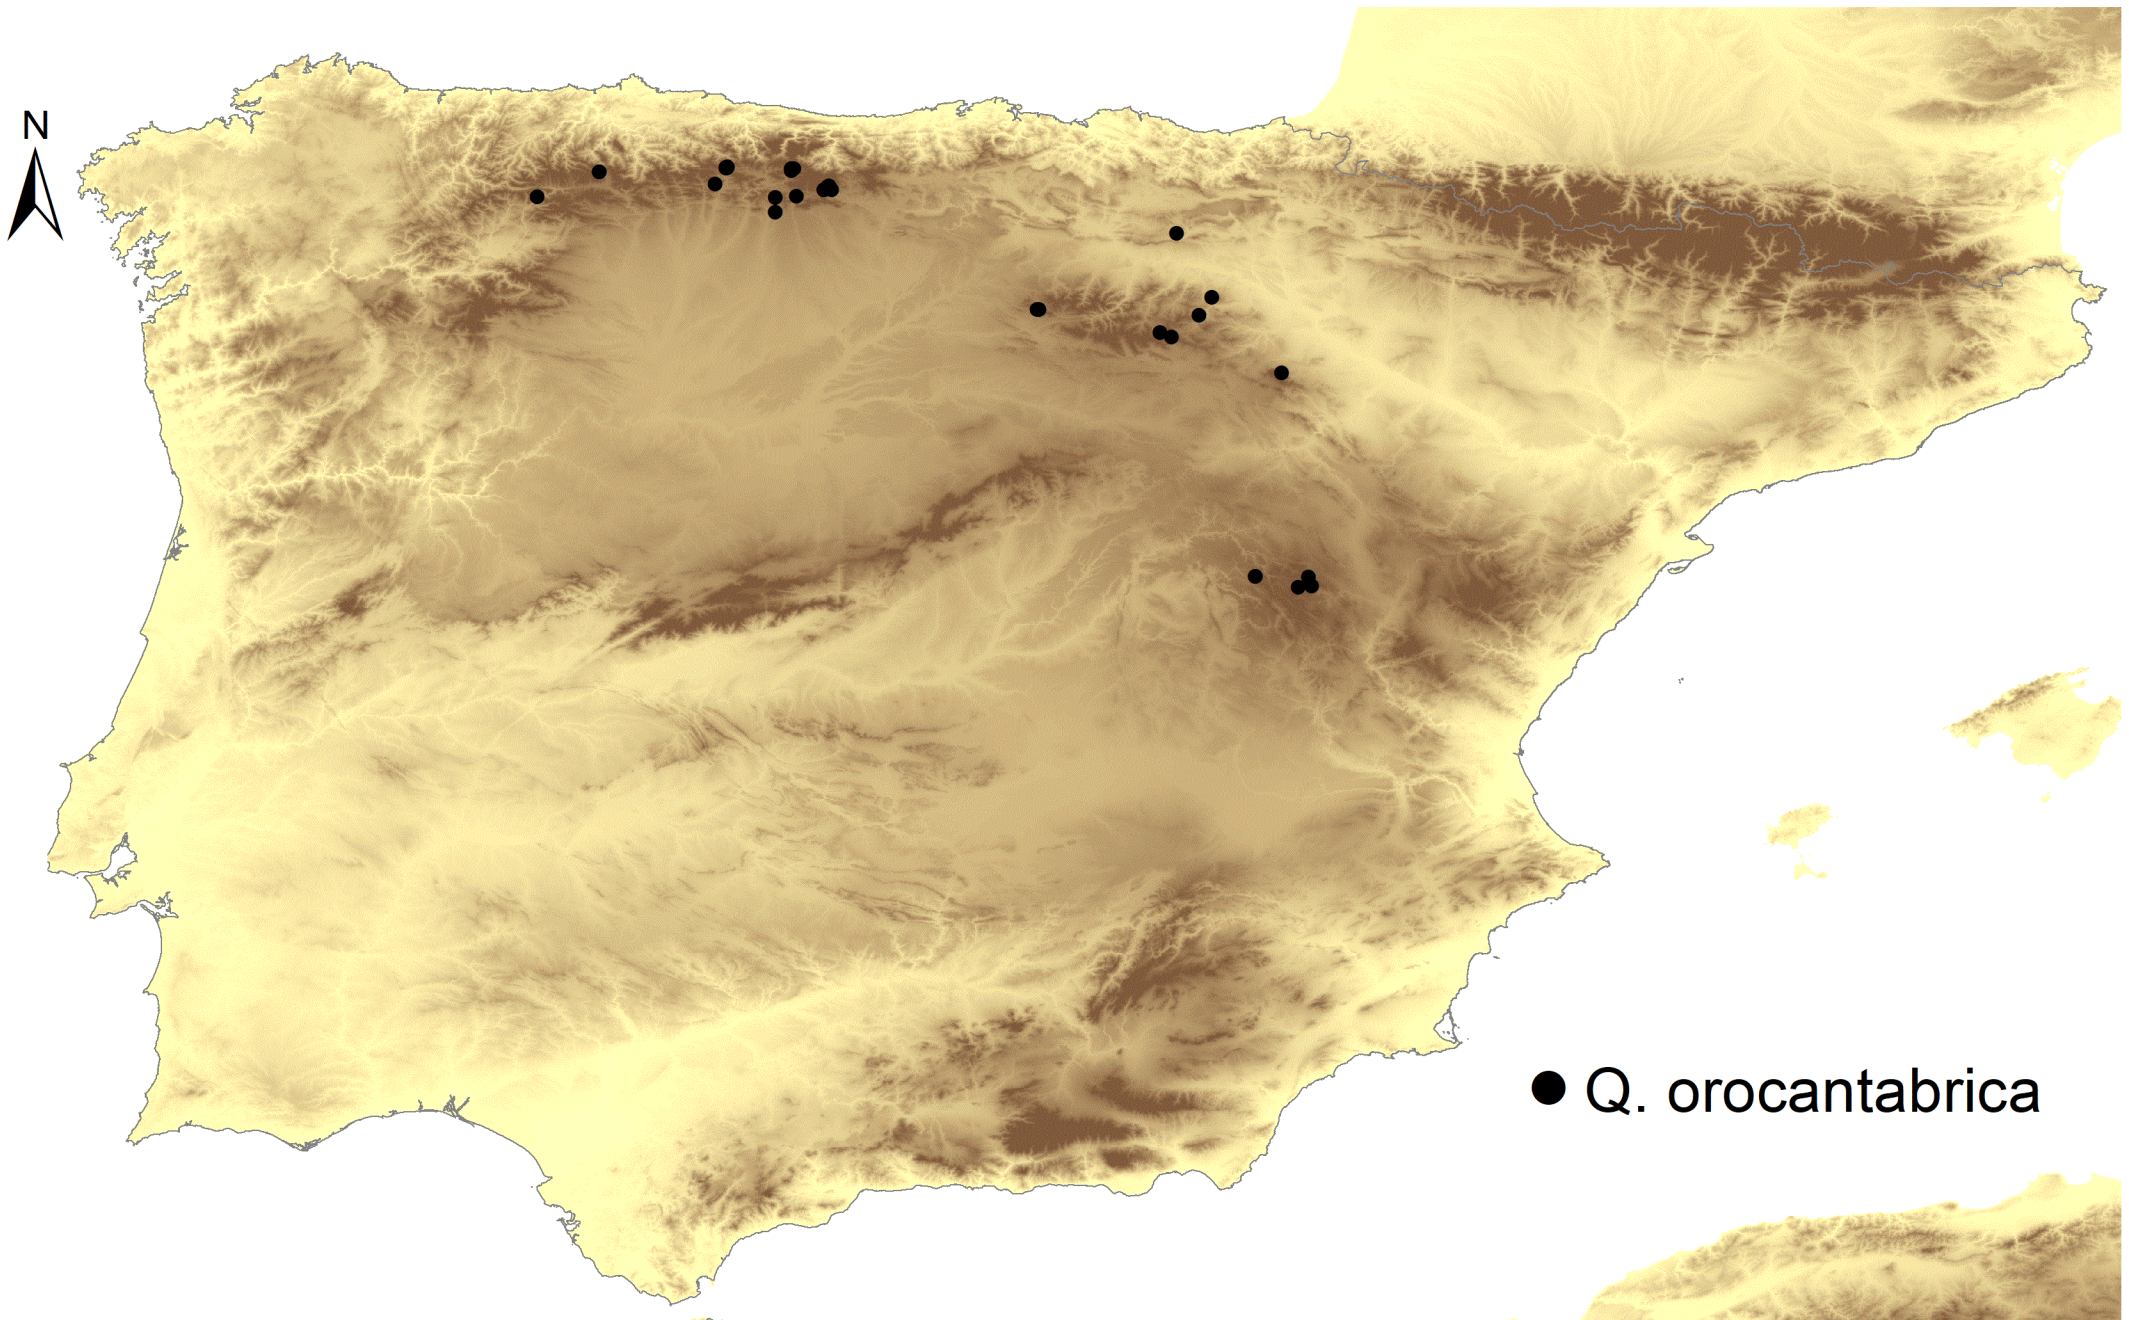

0 100 200 Km

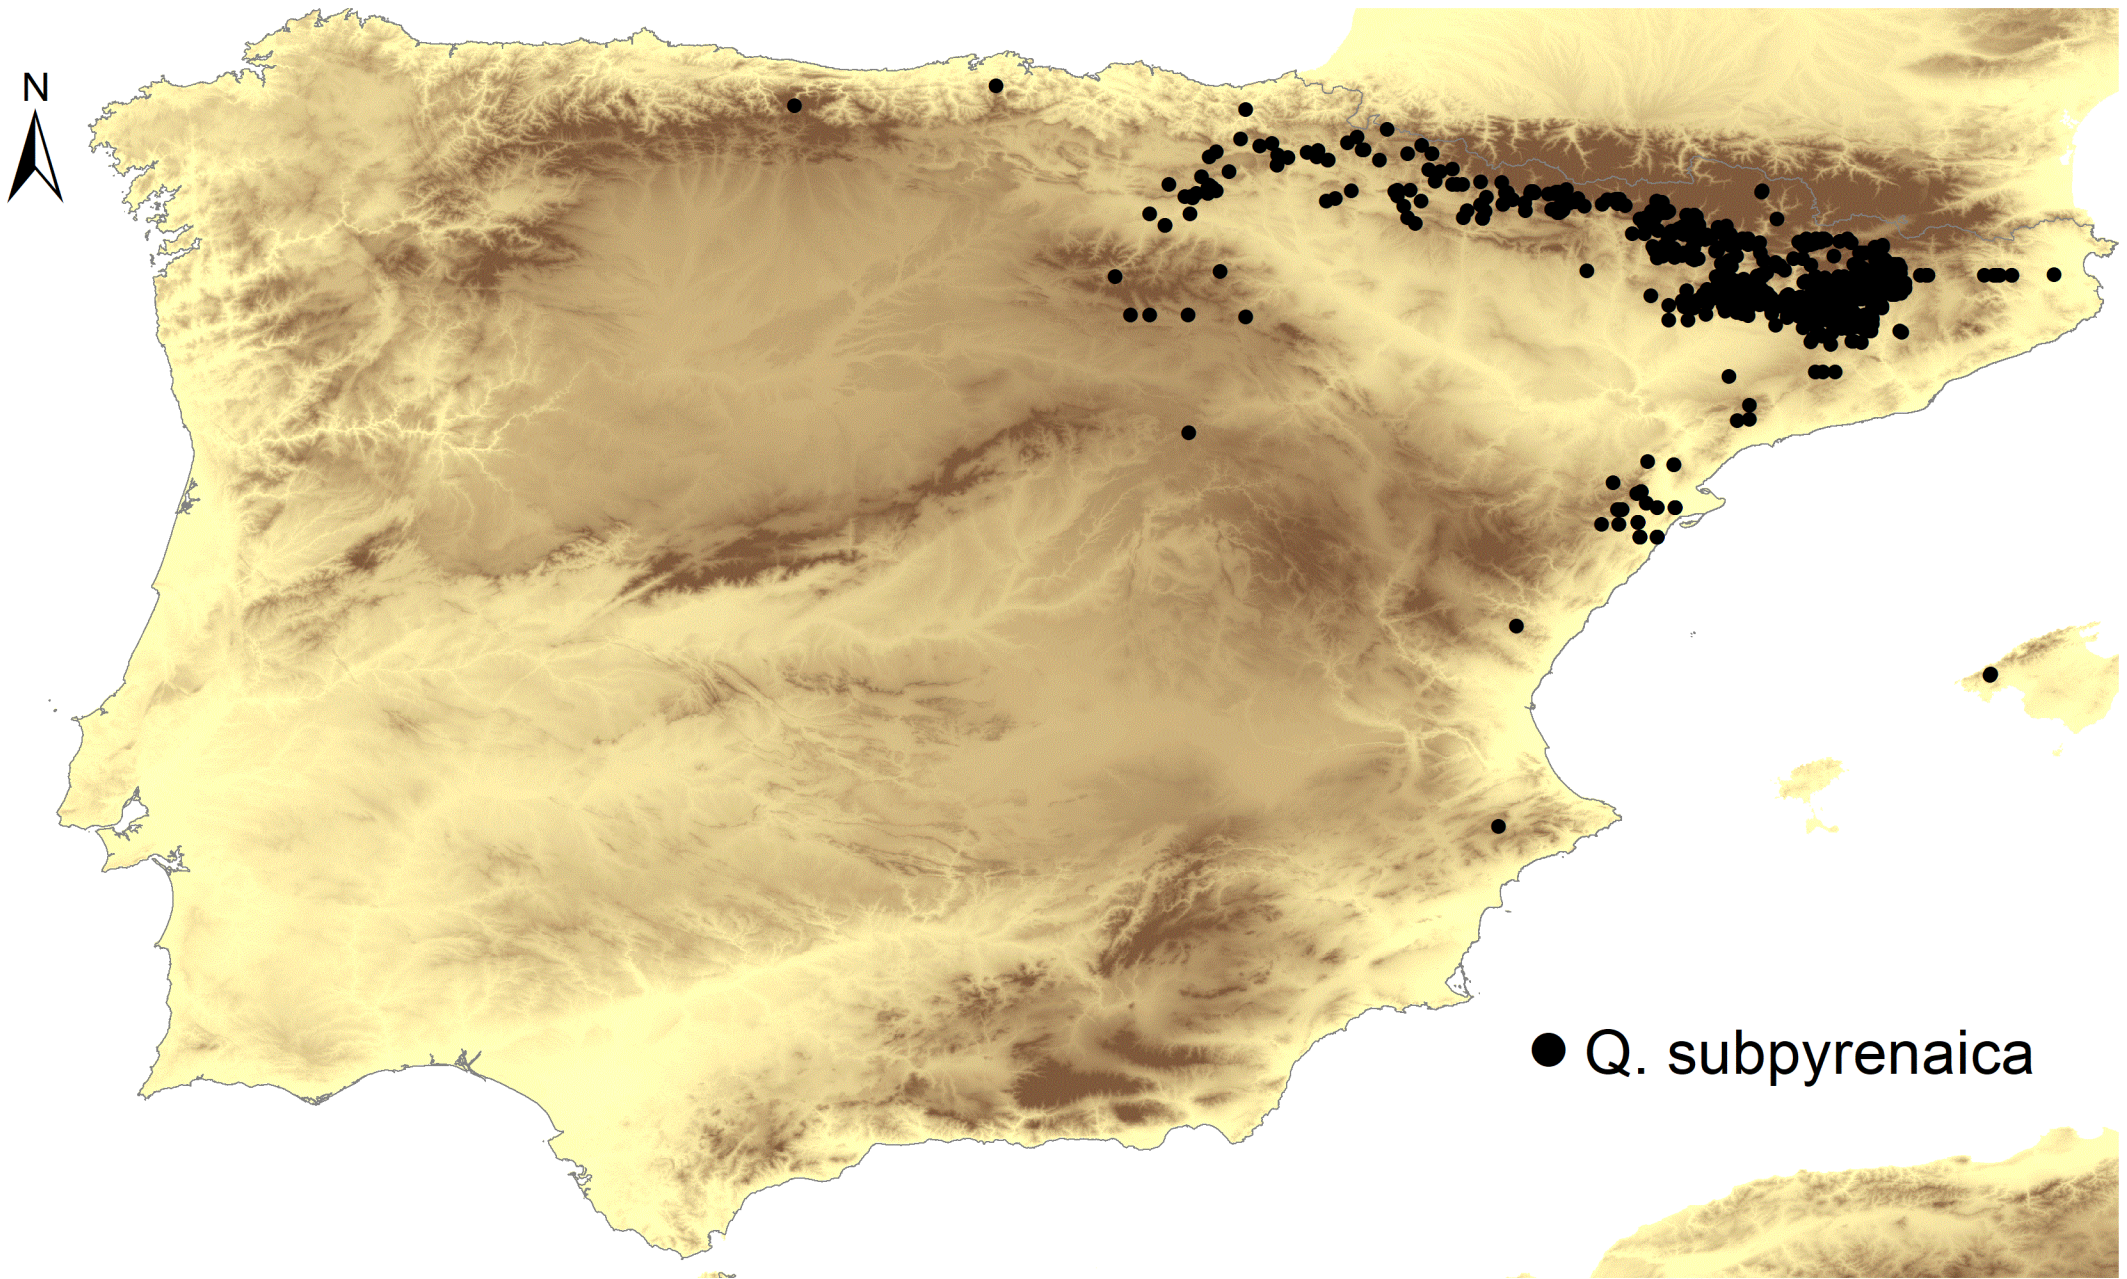

● *Q. subpyrenaica*

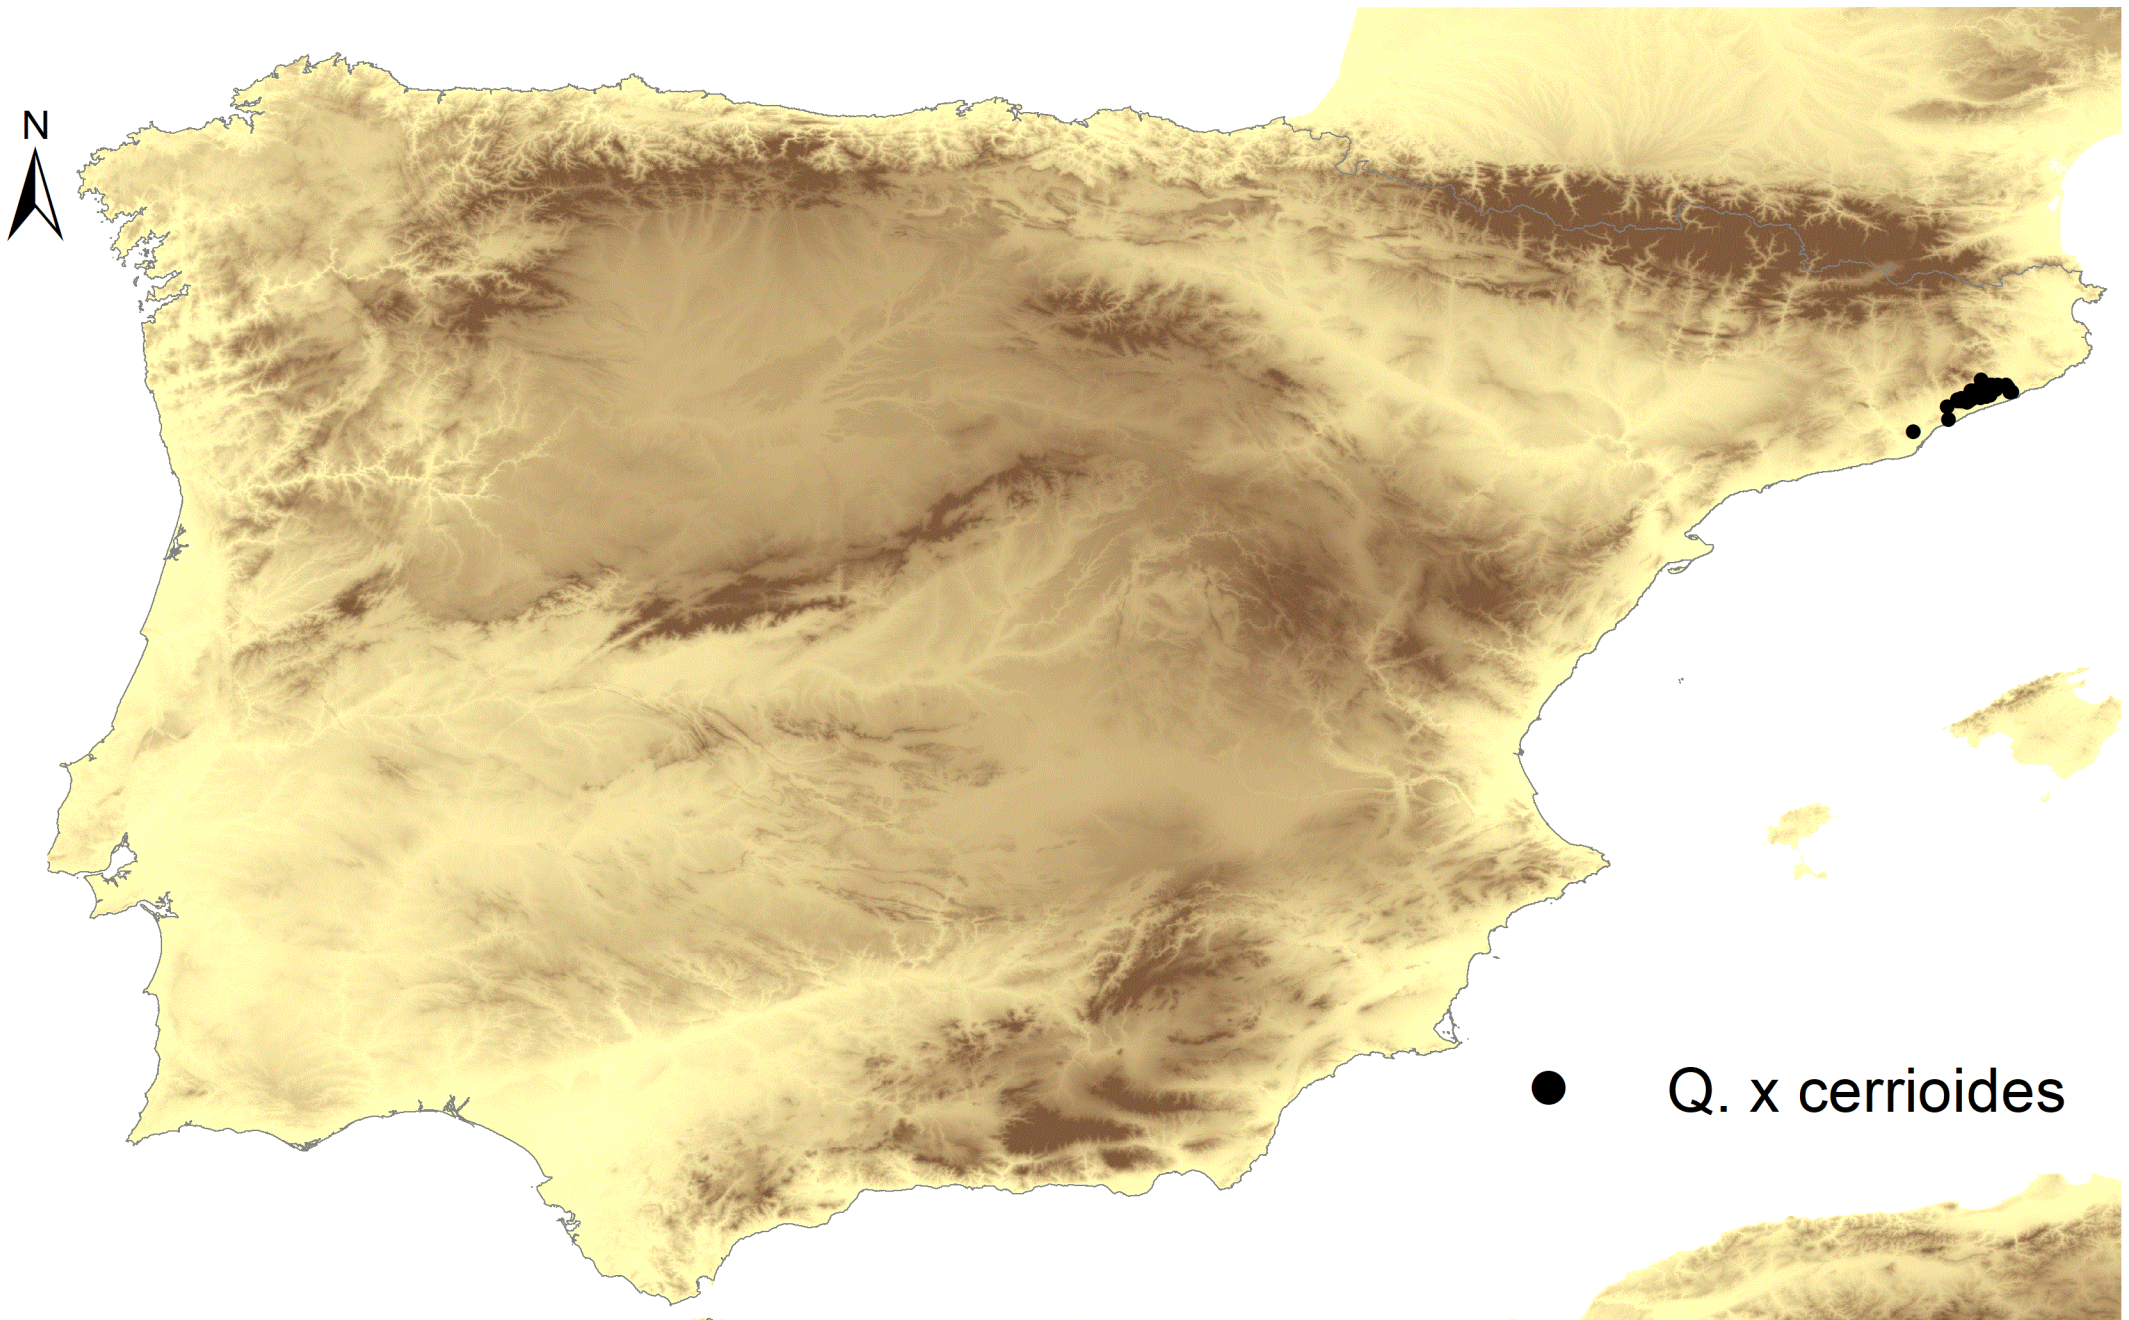

0 100 200 Km

● Q. x cerrioides

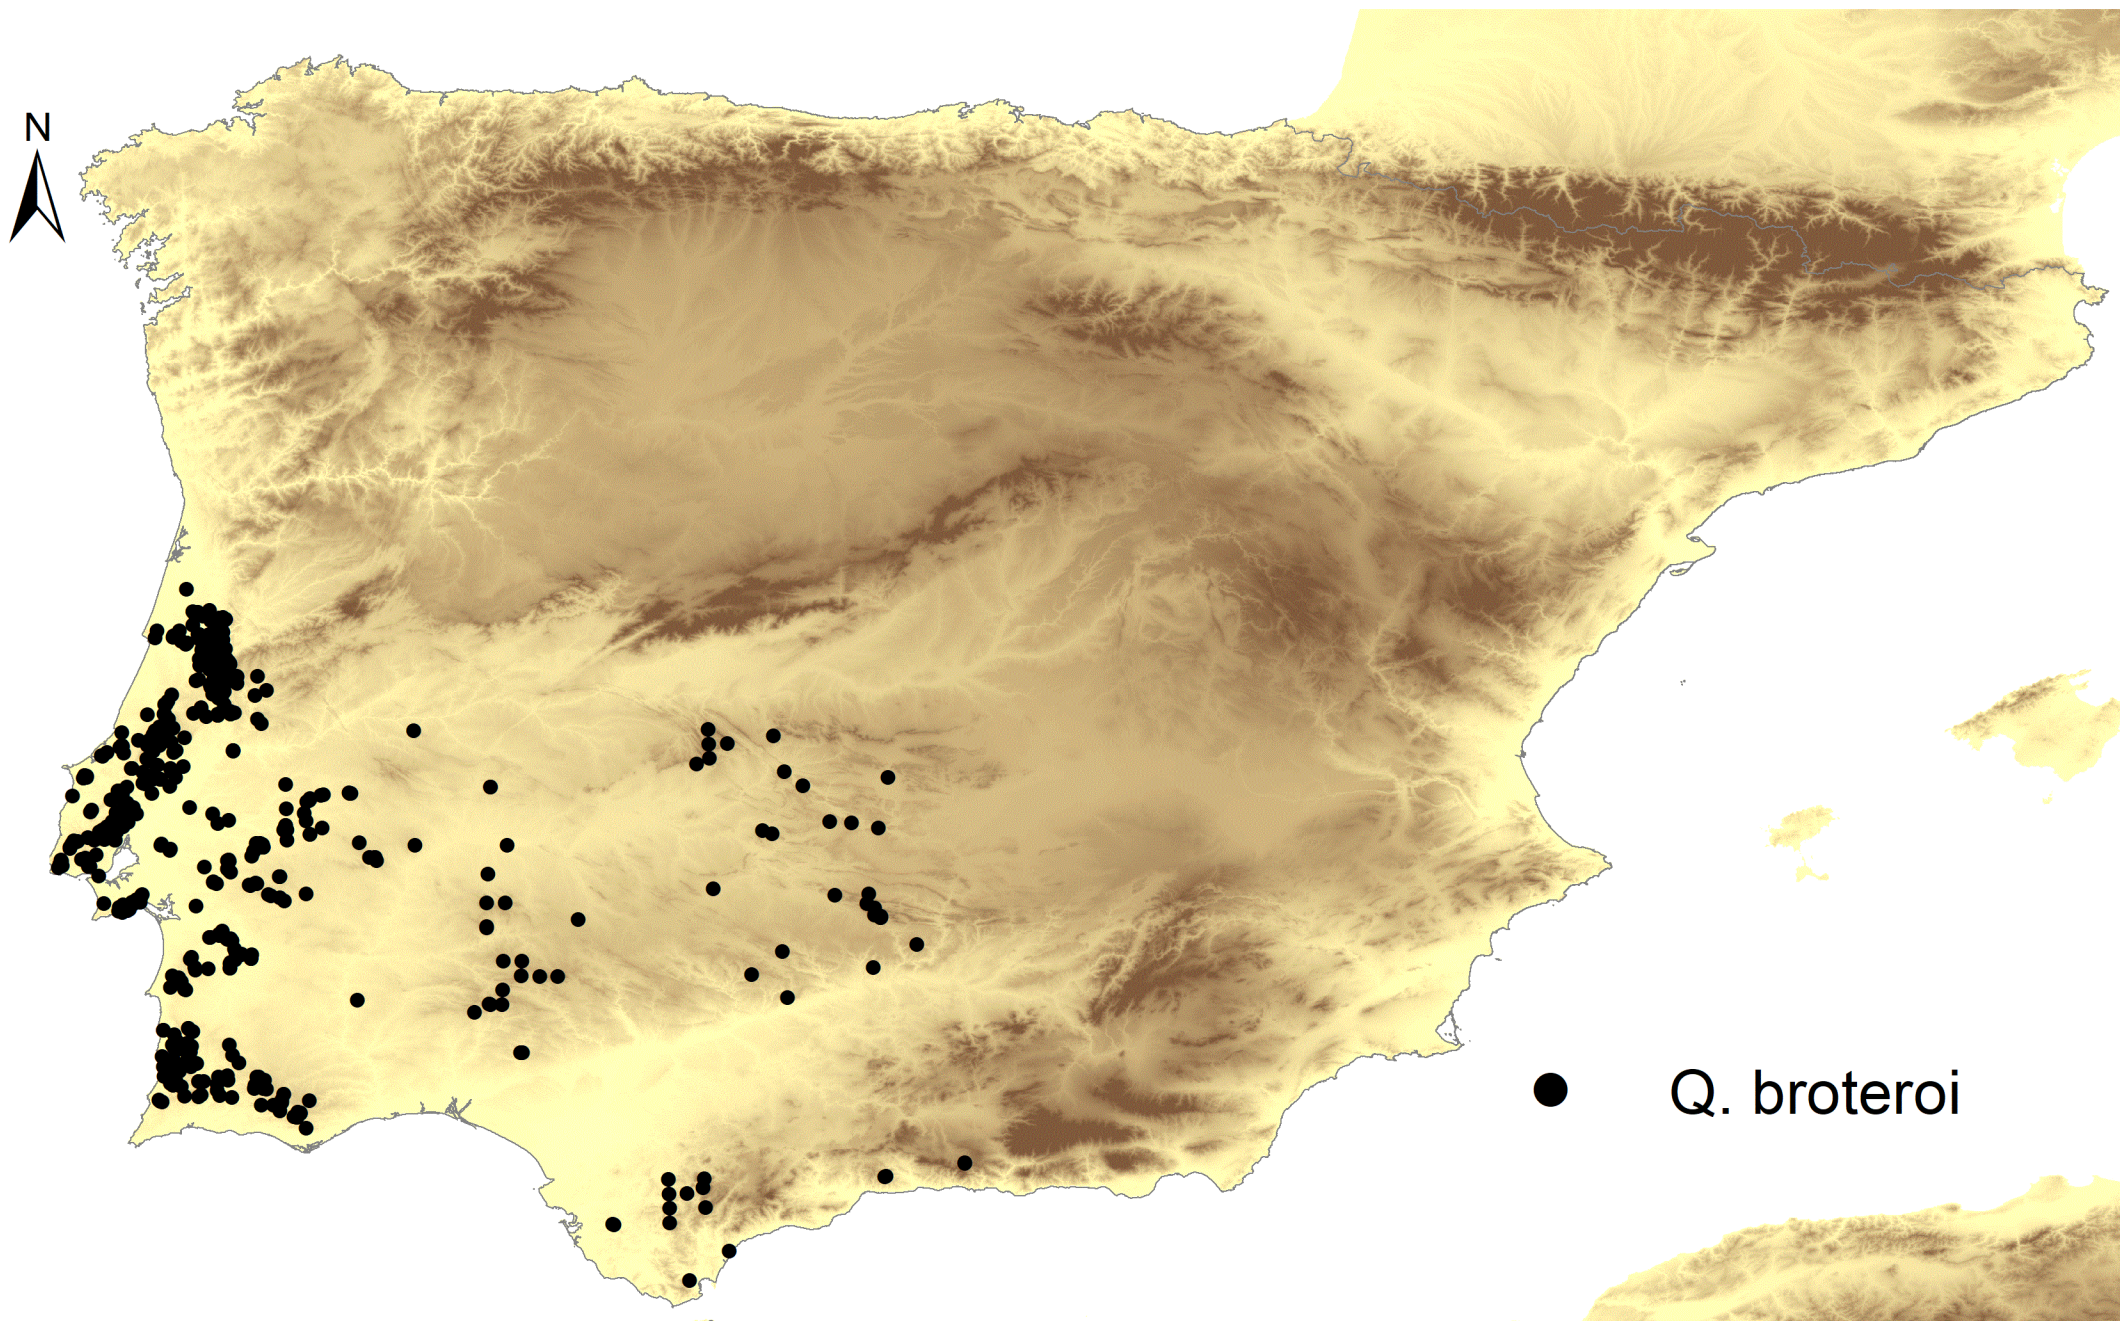

0 100 200 Km

● Q. broteroi

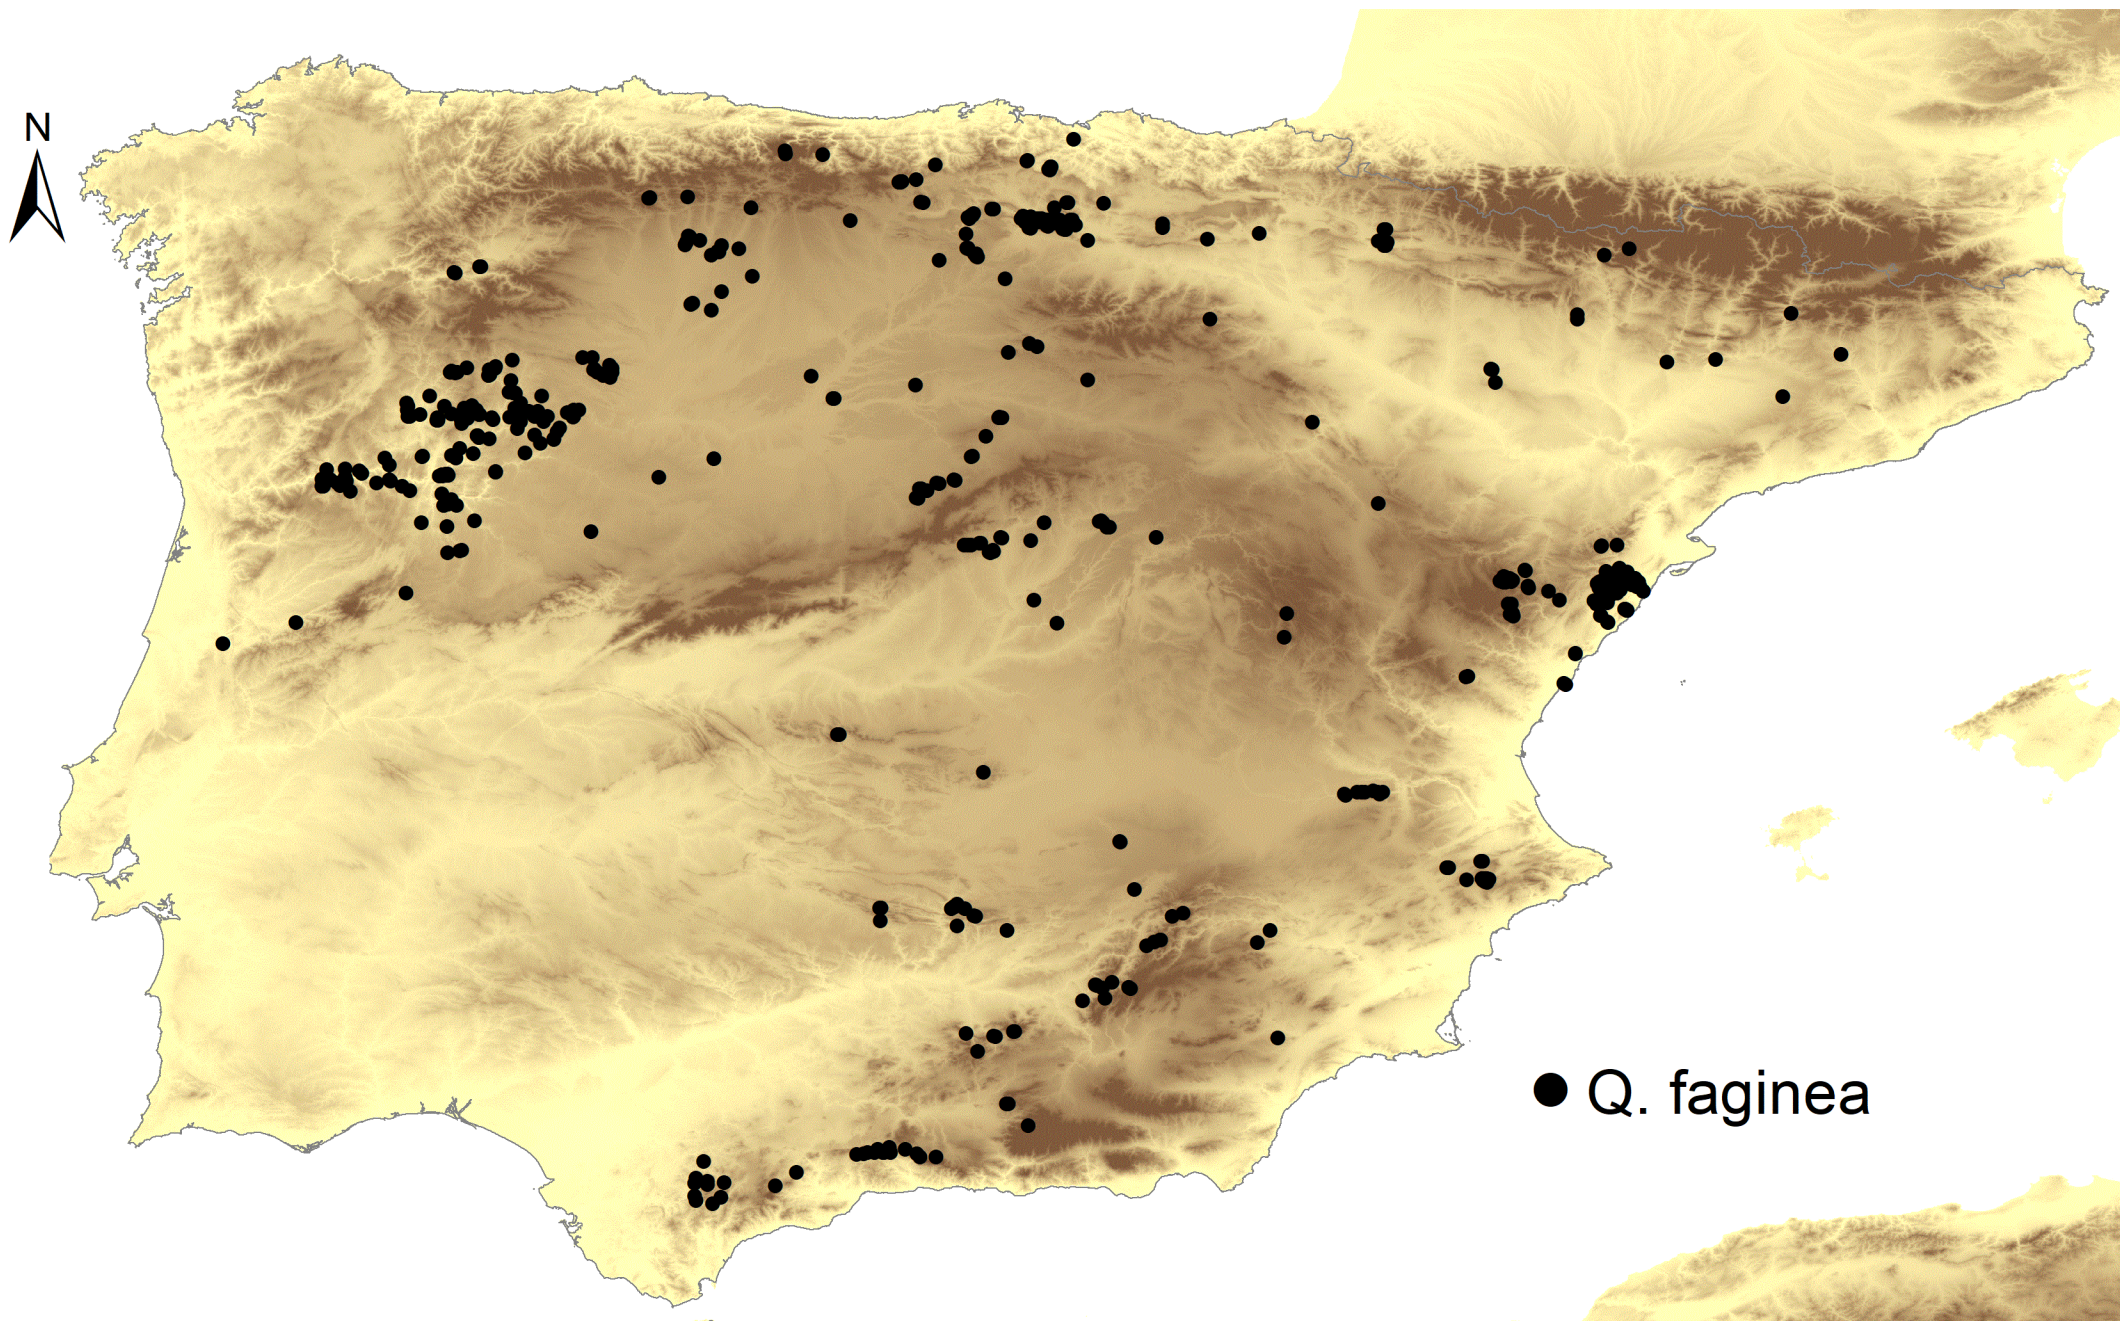

● *Q. faginea*

0 100 200 Km

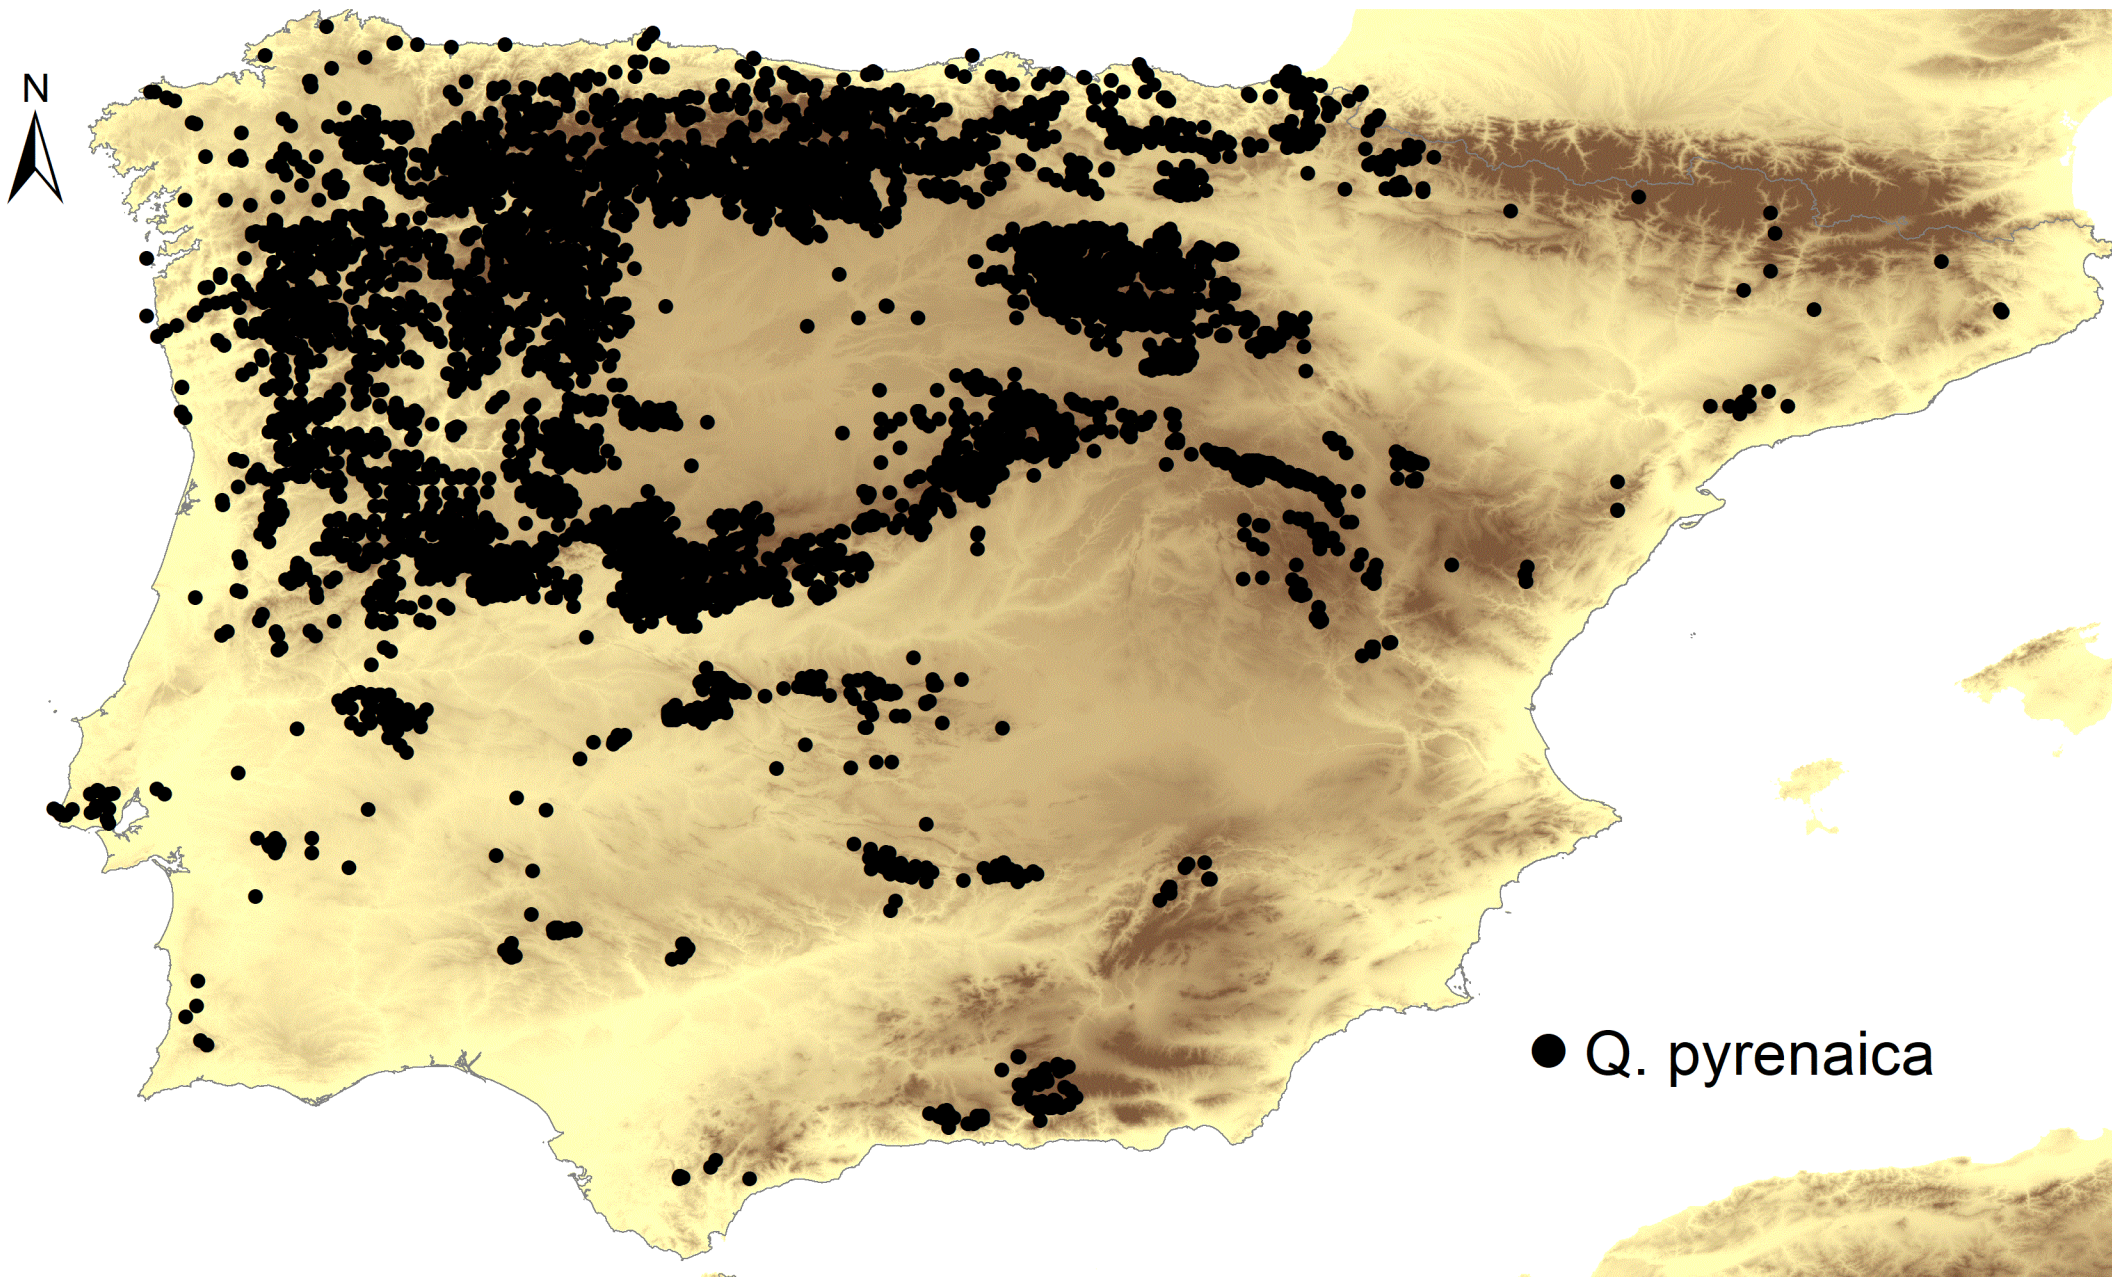

● *Q. pyrenaica*

0 100 200 Km

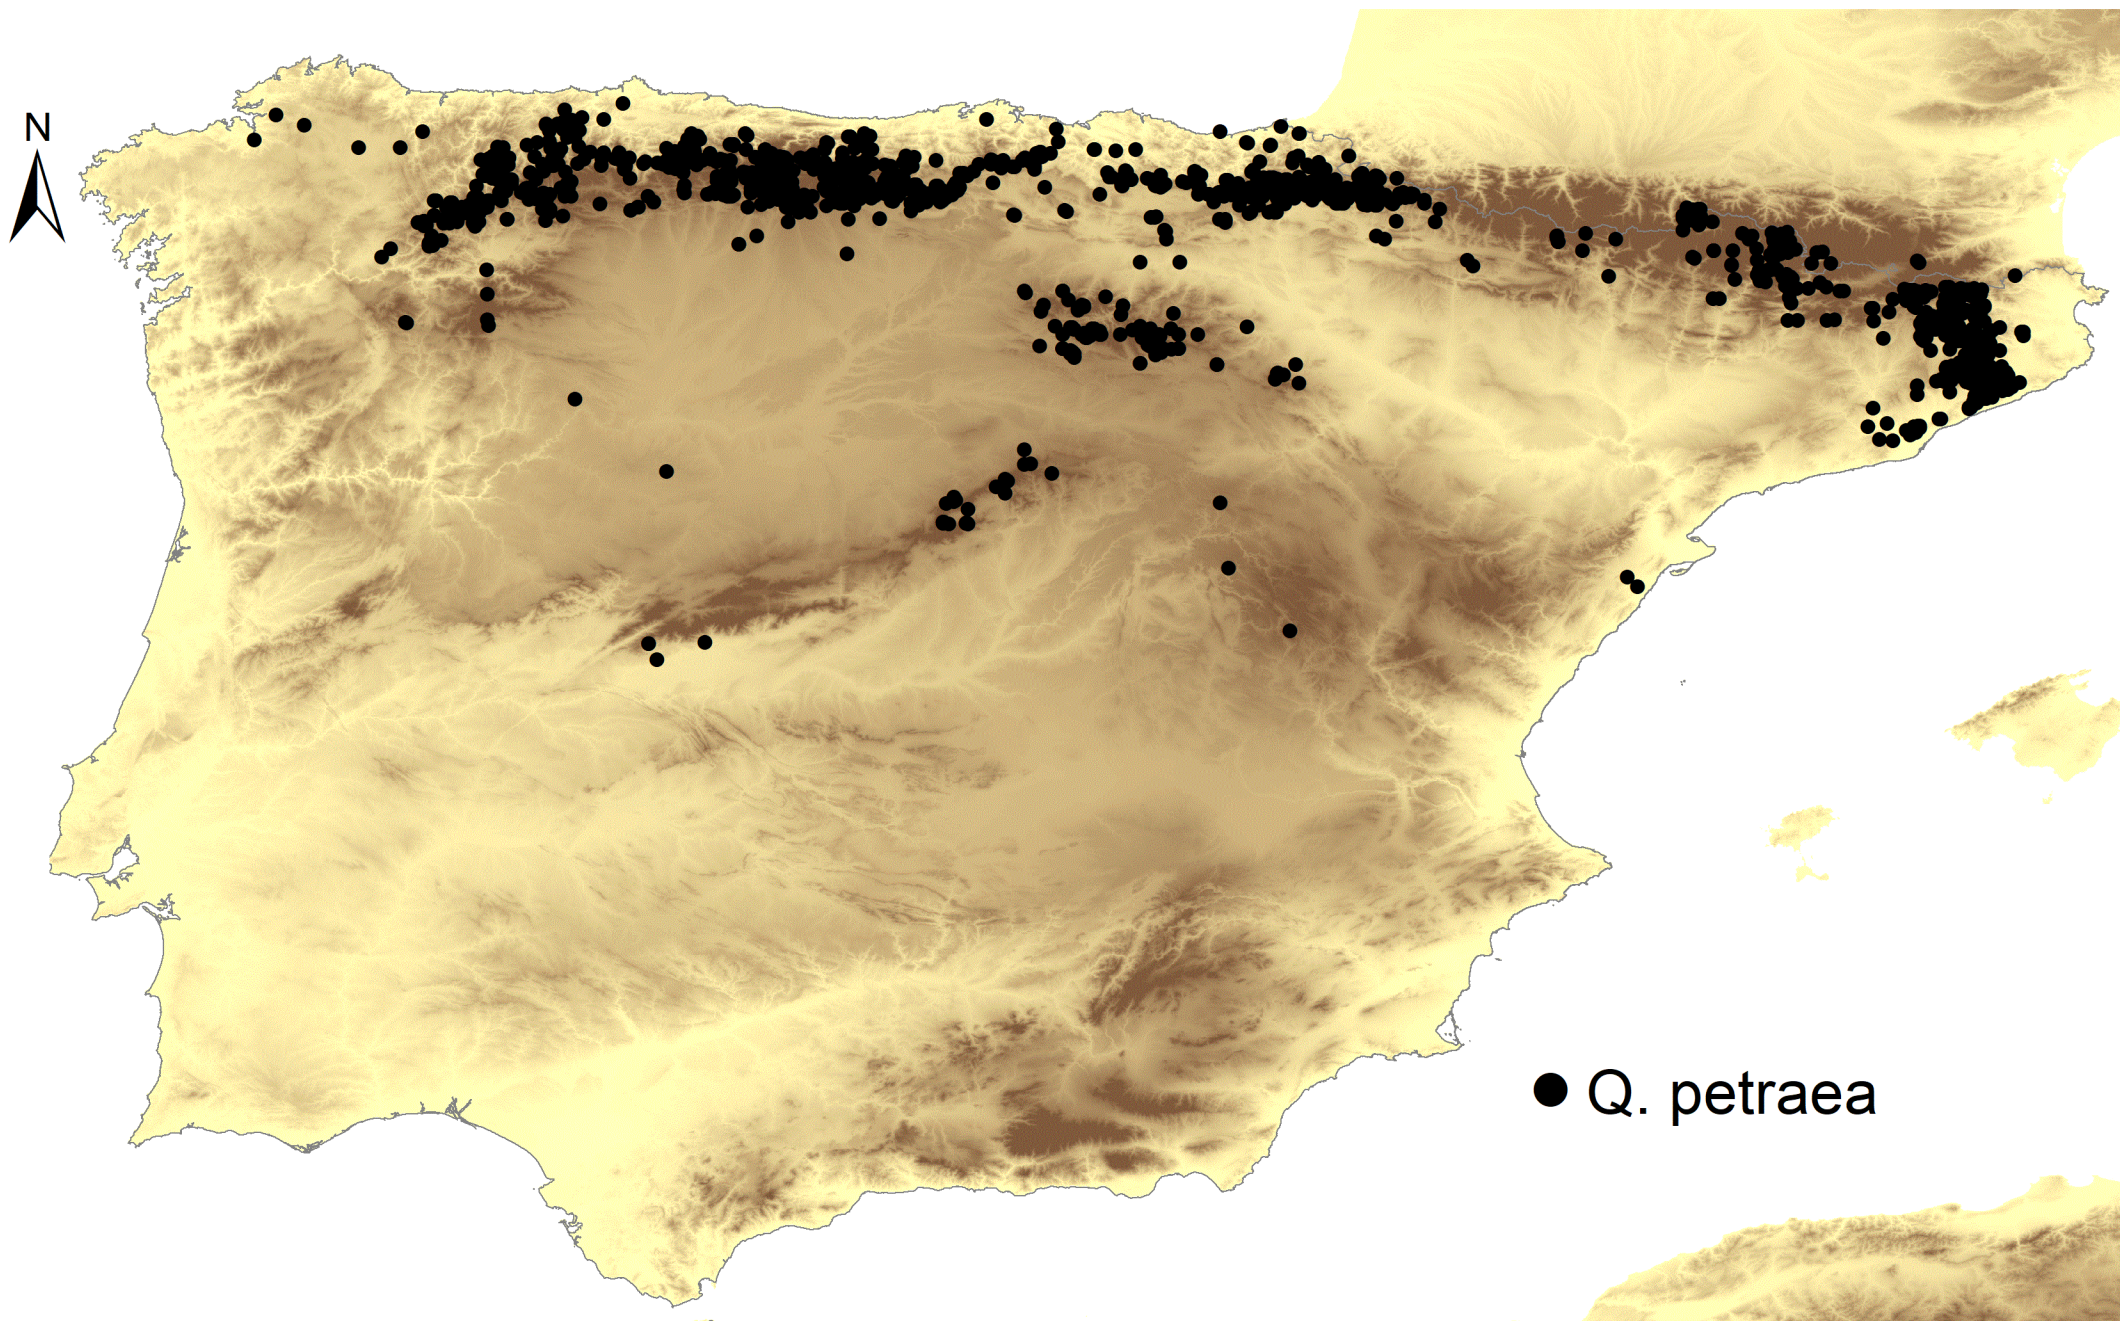

0 100 200 Km

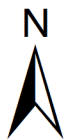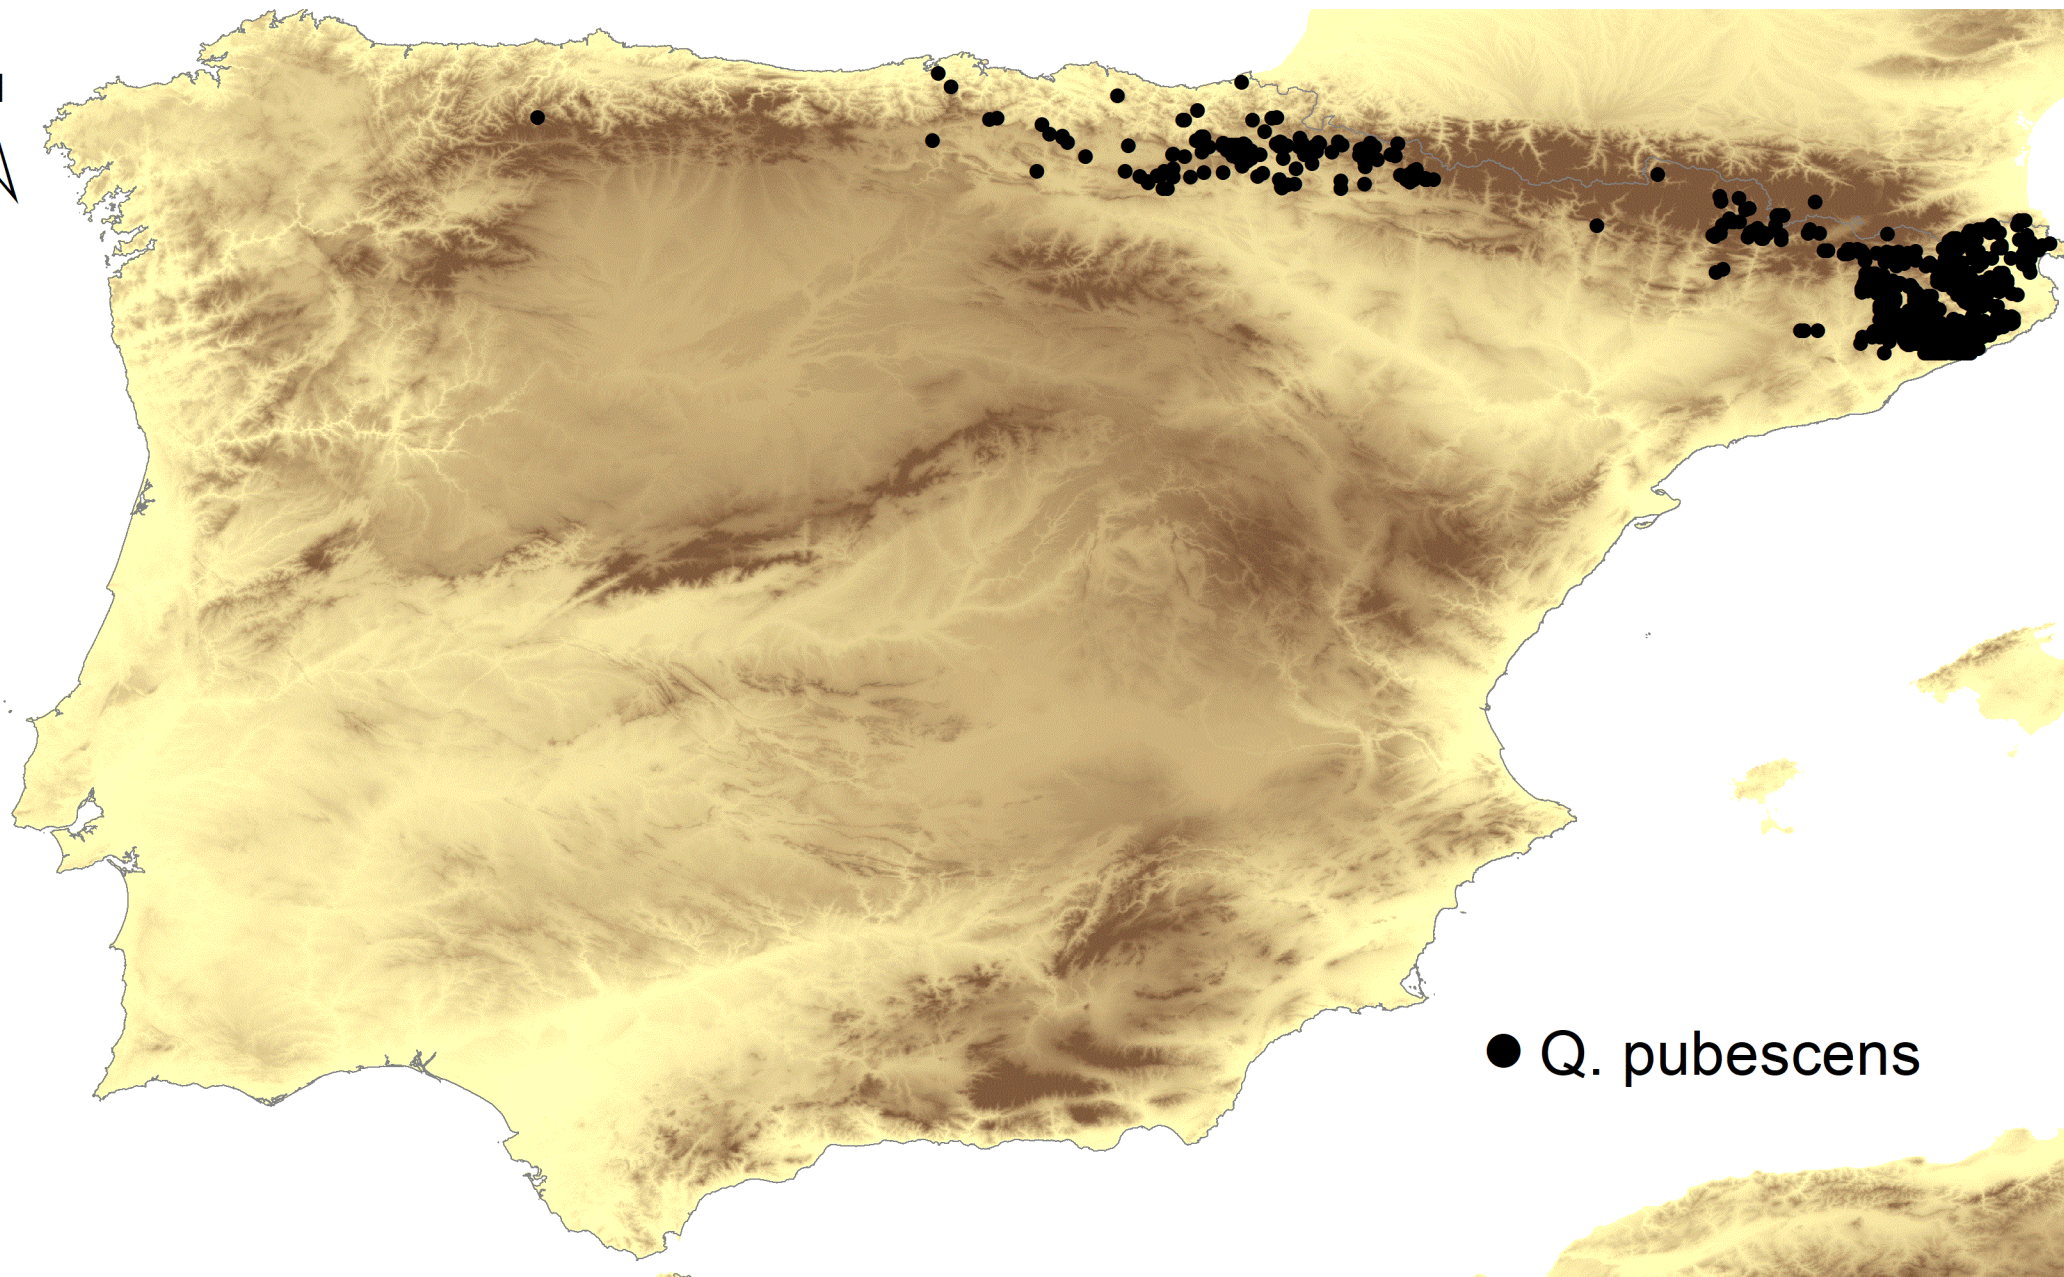

● *Q. pubescens*

0 100 200 Km

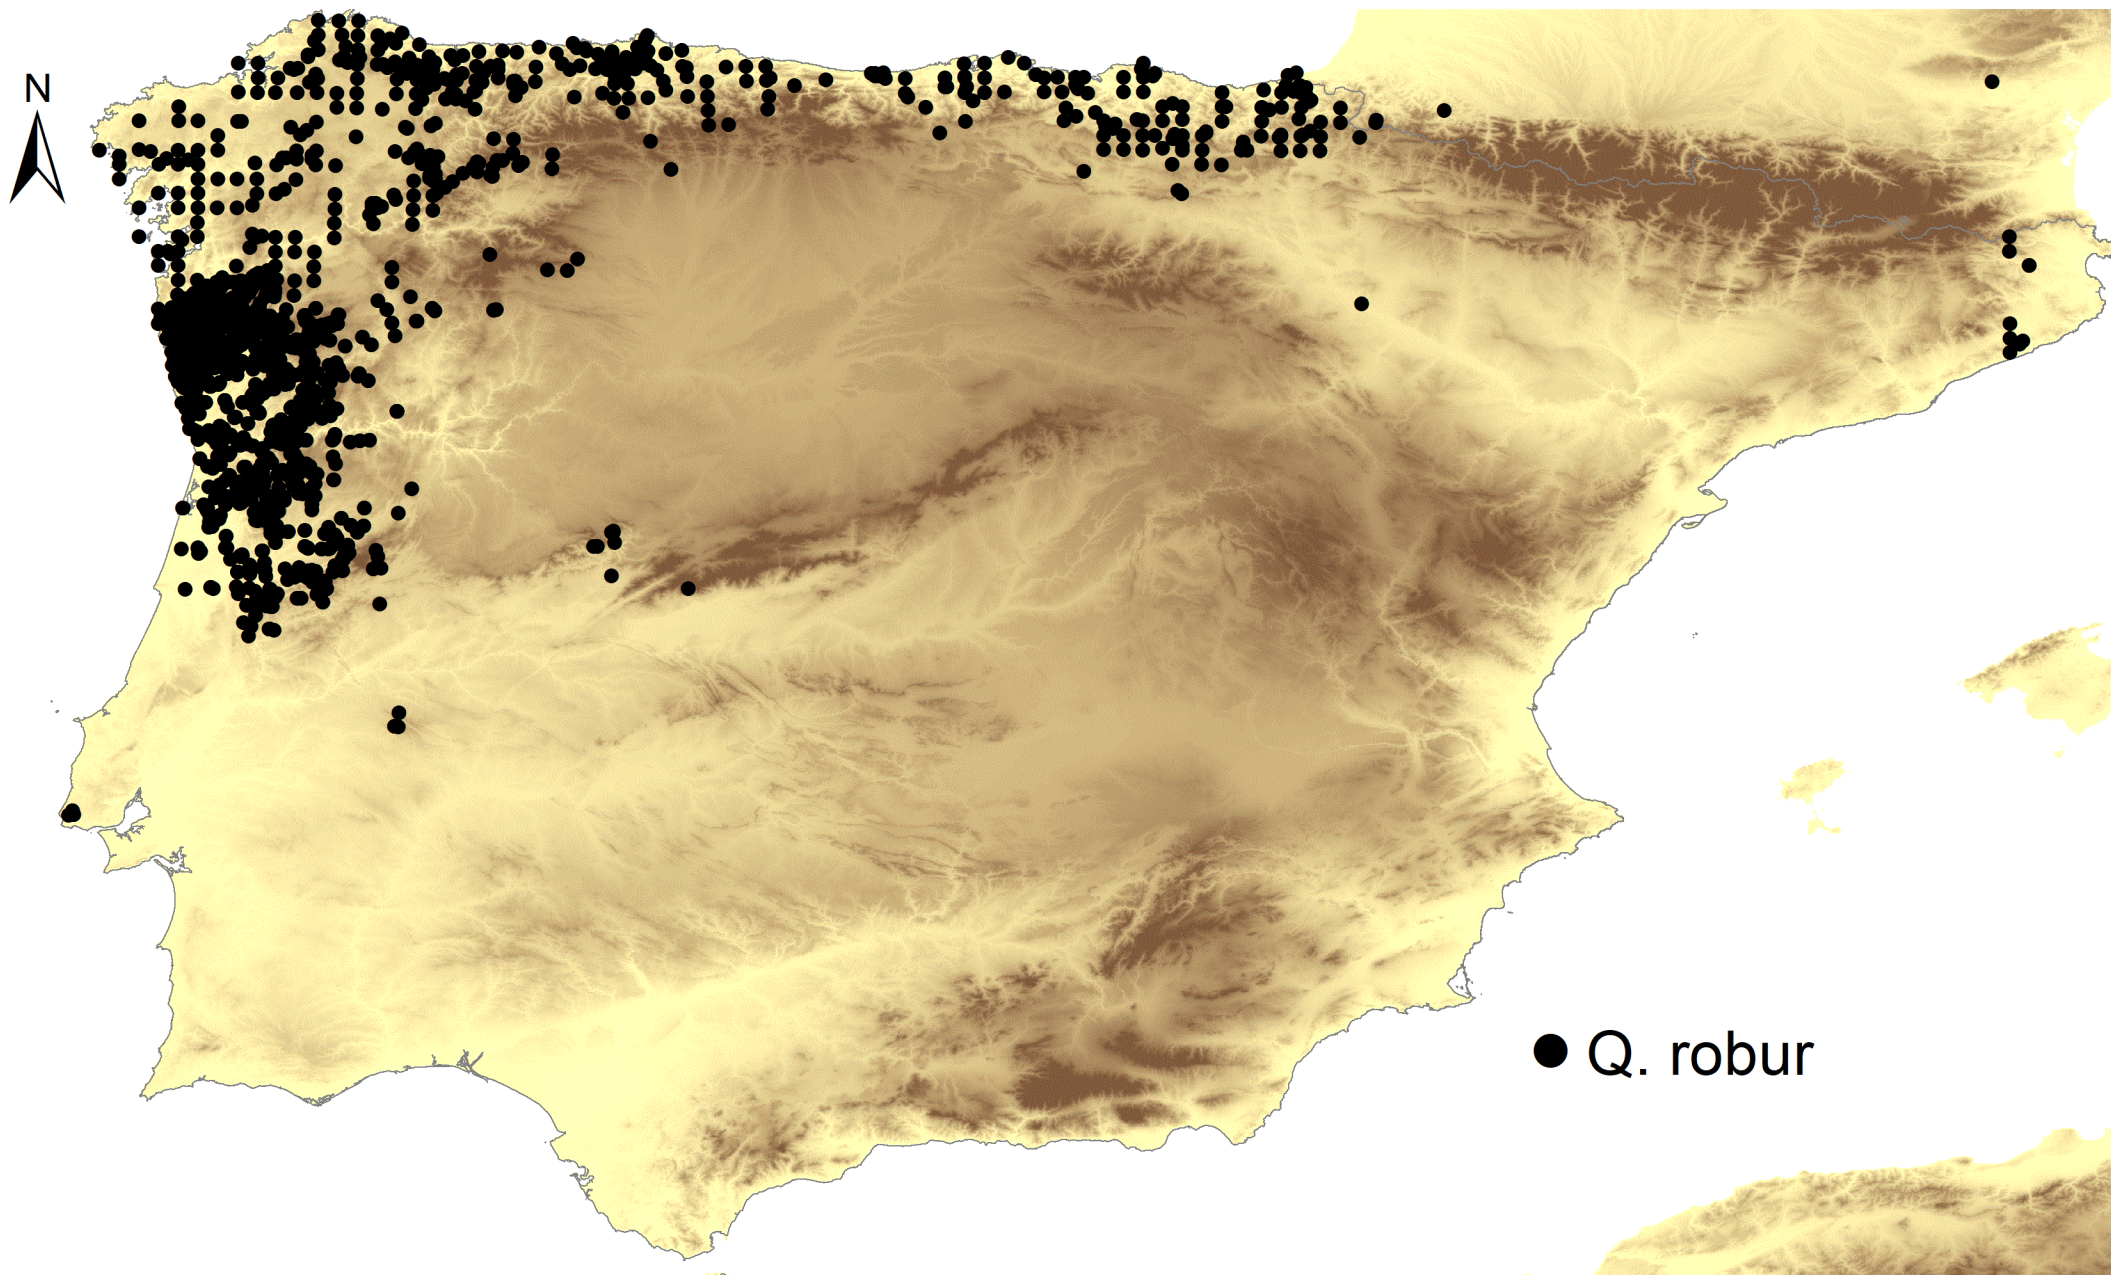

● *Q. robur*

0 100 200 Km
