# Supplementary material
Source: MDPI journal article supplement (https://www.mdpi.com/2220-9964/9/12/735)
Supplement: s1 [file s1 › Supplementary Information/Supplementary Information S4.pdf]

**Supplementary Information S4** - Index, Date (day/month/year)

1, 1/1/2001  
2, 9/1/2001  
3, 17/1/2001  
4, 25/1/2001  
5, 2/2/2001  
6, 10/2/2001  
7, 18/2/2001  
8, 26/2/2001  
9, 6/3/2001  
10, 14/3/2001  
11, 22/3/2001  
12, 30/3/2001  
13, 7/4/2001  
14, 15/4/2001  
15, 23/4/2001  
16, 1/5/2001  
17, 9/5/2001  
18, 17/5/2001  
19, 25/5/2001  
20, 2/6/2001  
21, 10/6/2001  
22, 26/6/2001  
23, 4/7/2001  
24, 12/7/2001  
25, 20/7/2001  
26, 28/7/2001  
27, 5/8/2001  
28, 13/8/2001  
29, 21/8/2001  
30, 29/8/2001  
31, 6/9/2001  
32, 14/9/2001  
33, 22/9/2001  
34, 30/9/2001  
35, 8/10/2001  
36, 16/10/2001  
37, 24/10/2001  
38, 1/11/2001  
39, 9/11/2001  
40, 17/11/2001  
41, 25/11/2001  
42, 3/12/2001  
43, 11/12/2001  
44, 19/12/2001  
45, 27/12/2001  
46, 1/1/2002  
47, 9/1/2002  
48, 17/1/2002  
49, 25/1/2002

50, 2/2/2002  
51, 10/2/2002  
52, 18/2/2002  
53, 26/2/2002  
54, 6/3/2002  
55, 14/3/2002  
56, 22/3/2002  
57, 30/3/2002  
58, 7/4/2002  
59, 15/4/2002  
60, 23/4/2002  
61, 1/5/2002  
62, 9/5/2002  
63, 17/5/2002  
64, 25/5/2002  
65, 2/6/2002  
66, 10/6/2002  
67, 18/6/2002  
68, 26/6/2002  
69, 4/7/2002  
70, 12/7/2002  
71, 20/7/2002  
72, 28/7/2002  
73, 5/8/2002  
74, 13/8/2002  
75, 21/8/2002  
76, 29/8/2002  
77, 6/9/2002  
78, 14/9/2002  
79, 22/9/2002  
80, 30/9/2002  
81, 8/10/2002  
82, 16/10/2002  
83, 24/10/2002  
84, 1/11/2002  
85, 9/11/2002  
86, 17/11/2002  
87, 25/11/2002  
88, 3/12/2002  
89, 11/12/2002  
90, 19/12/2002  
91, 27/12/2002  
92, 1/1/2003  
93, 9/1/2003  
94, 17/1/2003  
95, 25/1/2003  
96, 2/2/2003  
97, 10/2/2003  
98, 18/2/2003  
99, 26/2/2003

100, 6/3/2003  
101, 14/3/2003  
102, 22/3/2003  
103, 30/3/2003  
104, 7/4/2003  
105, 15/4/2003  
106, 23/4/2003  
107, 1/5/2003  
108, 9/5/2003  
109, 17/5/2003  
110, 25/5/2003  
111, 2/6/2003  
112, 10/6/2003  
113, 18/6/2003  
114, 26/6/2003  
115, 4/7/2003  
116, 12/7/2003  
117, 20/7/2003  
118, 28/7/2003  
119, 5/8/2003  
120, 13/8/2003  
121, 21/8/2003  
122, 29/8/2003  
123, 6/9/2003  
124, 14/9/2003  
125, 22/9/2003  
126, 30/9/2003  
127, 8/10/2003  
128, 16/10/2003  
129, 24/10/2003  
130, 1/11/2003  
131, 9/11/2003  
132, 17/11/2003  
133, 25/11/2003  
134, 3/12/2003  
135, 11/12/2003  
136, 19/12/2003  
137, 27/12/2003  
138, 1/1/2004  
139, 9/1/2004  
140, 17/1/2004  
141, 25/1/2004  
142, 2/2/2004  
143, 10/2/2004  
144, 18/2/2004  
145, 26/2/2004  
146, 5/3/2004  
147, 13/3/2004  
148, 21/3/2004  
149, 29/3/2004

150, 6/4/2004  
151, 14/4/2004  
152, 22/4/2004  
153, 30/4/2004  
154, 8/5/2004  
155, 16/5/2004  
156, 24/5/2004  
157, 1/6/2004  
158, 9/6/2004  
159, 17/6/2004  
160, 25/6/2004  
161, 3/7/2004  
162, 11/7/2004  
163, 19/7/2004  
164, 27/7/2004  
165, 4/8/2004  
166, 12/8/2004  
167, 20/8/2004  
168, 28/8/2004  
169, 5/9/2004  
170, 13/9/2004  
171, 21/9/2004  
172, 29/9/2004  
173, 7/10/2004  
174, 15/10/2004  
175, 23/10/2004  
176, 31/10/2004  
177, 8/11/2004  
178, 16/11/2004  
179, 24/11/2004  
180, 2/12/2004  
181, 10/12/2004  
182, 18/12/2004  
183, 26/12/2004  
184, 1/1/2005  
185, 9/1/2005  
186, 17/1/2005  
187, 25/1/2005  
188, 2/2/2005  
189, 10/2/2005  
190, 18/2/2005  
191, 26/2/2005  
192, 6/3/2005  
193, 14/3/2005  
194, 22/3/2005  
195, 30/3/2005  
196, 7/4/2005  
197, 15/4/2005  
198, 23/4/2005  
199, 1/5/2005

200, 9/5/2005  
201, 17/5/2005  
202, 25/5/2005  
203, 2/6/2005  
204, 10/6/2005  
205, 18/6/2005  
206, 26/6/2005  
207, 4/7/2005  
208, 12/7/2005  
209, 20/7/2005  
210, 28/7/2005  
211, 5/8/2005  
212, 13/8/2005  
213, 21/8/2005  
214, 29/8/2005  
215, 6/9/2005  
216, 14/9/2005  
217, 22/9/2005  
218, 30/9/2005  
219, 8/10/2005  
220, 16/10/2005  
221, 24/10/2005  
222, 1/11/2005  
223, 9/11/2005  
224, 17/11/2005  
225, 25/11/2005  
226, 3/12/2005  
227, 11/12/2005  
228, 19/12/2005  
229, 27/12/2005  
230, 1/1/2006  
231, 9/1/2006  
232, 17/1/2006  
233, 25/1/2006  
234, 2/2/2006  
235, 10/2/2006  
236, 18/2/2006  
237, 26/2/2006  
238, 6/3/2006  
239, 14/3/2006  
240, 22/3/2006  
241, 30/3/2006  
242, 7/4/2006  
243, 15/4/2006  
244, 23/4/2006  
245, 1/5/2006  
246, 9/5/2006  
247, 17/5/2006  
248, 25/5/2006  
249, 2/6/2006

250, 10/6/2006  
251, 18/6/2006  
252, 26/6/2006  
253, 4/7/2006  
254, 12/7/2006  
255, 20/7/2006  
256, 28/7/2006  
257, 5/8/2006  
258, 13/8/2006  
259, 21/8/2006  
260, 29/8/2006  
261, 6/9/2006  
262, 14/9/2006  
263, 22/9/2006  
264, 30/9/2006  
265, 8/10/2006  
266, 16/10/2006  
267, 24/10/2006  
268, 1/11/2006  
269, 9/11/2006  
270, 17/11/2006  
271, 25/11/2006  
272, 3/12/2006  
273, 11/12/2006  
274, 19/12/2006  
275, 27/12/2006  
276, 1/1/2007  
277, 9/1/2007  
278, 17/1/2007  
279, 25/1/2007  
280, 2/2/2007  
281, 10/2/2007  
282, 18/2/2007  
283, 26/2/2007  
284, 6/3/2007  
285, 14/3/2007  
286, 22/3/2007  
287, 30/3/2007  
288, 7/4/2007  
289, 15/4/2007  
290, 23/4/2007  
291, 1/5/2007  
292, 9/5/2007  
293, 17/5/2007  
294, 25/5/2007  
295, 2/6/2007  
296, 10/6/2007  
297, 18/6/2007  
298, 26/6/2007  
299, 4/7/2007

300, 12/7/2007  
301, 20/7/2007  
302, 28/7/2007  
303, 5/8/2007  
304, 13/8/2007  
305, 21/8/2007  
306, 29/8/2007  
307, 6/9/2007  
308, 14/9/2007  
309, 22/9/2007  
310, 30/9/2007  
311, 8/10/2007  
312, 16/10/2007  
313, 24/10/2007  
314, 1/11/2007  
315, 9/11/2007  
316, 17/11/2007  
317, 25/11/2007  
318, 3/12/2007  
319, 11/12/2007  
320, 19/12/2007  
321, 27/12/2007  
322, 1/1/2008  
323, 9/1/2008  
324, 17/1/2008  
325, 25/1/2008  
326, 2/2/2008  
327, 10/2/2008  
328, 18/2/2008  
329, 26/2/2008  
330, 5/3/2008  
331, 13/3/2008  
332, 21/3/2008  
333, 29/3/2008  
334, 6/4/2008  
335, 14/4/2008  
336, 22/4/2008  
337, 30/4/2008  
338, 8/5/2008  
339, 16/5/2008  
340, 24/5/2008  
341, 1/6/2008  
342, 9/6/2008  
343, 17/6/2008  
344, 25/6/2008  
345, 3/7/2008  
346, 11/7/2008  
347, 19/7/2008  
348, 27/7/2008  
349, 4/8/2008

350, 12/8/2008  
351, 20/8/2008  
352, 28/8/2008  
353, 5/9/2008  
354, 13/9/2008  
355, 21/9/2008  
356, 29/9/2008  
357, 7/10/2008  
358, 15/10/2008  
359, 23/10/2008  
360, 31/10/2008  
361, 8/11/2008  
362, 16/11/2008  
363, 24/11/2008  
364, 2/12/2008  
365, 10/12/2008  
366, 18/12/2008  
367, 26/12/2008  
368, 1/1/2009  
369, 9/1/2009  
370, 17/1/2009  
371, 25/1/2009  
372, 2/2/2009  
373, 10/2/2009  
374, 18/2/2009  
375, 26/2/2009  
376, 6/3/2009  
377, 14/3/2009  
378, 22/3/2009  
379, 30/3/2009  
380, 7/4/2009  
381, 15/4/2009  
382, 23/4/2009  
383, 1/5/2009  
384, 9/5/2009  
385, 17/5/2009  
386, 25/5/2009  
387, 2/6/2009  
388, 10/6/2009  
389, 18/6/2009  
390, 26/6/2009  
391, 4/7/2009  
392, 12/7/2009  
393, 20/7/2009  
394, 28/7/2009  
395, 5/8/2009  
396, 13/8/2009  
397, 21/8/2009  
398, 29/8/2009  
399, 6/9/2009

400, 14/9/2009  
401, 22/9/2009  
402, 30/9/2009  
403, 8/10/2009  
404, 16/10/2009  
405, 24/10/2009  
406, 1/11/2009  
407, 9/11/2009  
408, 17/11/2009  
409, 25/11/2009  
410, 3/12/2009  
411, 11/12/2009  
412, 19/12/2009  
413, 27/12/2009  
414, 1/1/2010  
415, 9/1/2010  
416, 17/1/2010  
417, 25/1/2010  
418, 2/2/2010  
419, 10/2/2010  
420, 18/2/2010  
421, 26/2/2010  
422, 6/3/2010  
423, 14/3/2010  
424, 22/3/2010  
425, 30/3/2010  
426, 7/4/2010  
427, 15/4/2010  
428, 23/4/2010  
429, 1/5/2010  
430, 9/5/2010  
431, 17/5/2010  
432, 25/5/2010  
433, 2/6/2010  
434, 10/6/2010  
435, 18/6/2010  
436, 26/6/2010  
437, 4/7/2010  
438, 12/7/2010  
439, 20/7/2010  
440, 28/7/2010  
441, 5/8/2010  
442, 13/8/2010  
443, 21/8/2010  
444, 29/8/2010  
445, 6/9/2010  
446, 14/9/2010  
447, 22/9/2010  
448, 30/9/2010  
449, 8/10/2010

450, 16/10/2010  
451, 24/10/2010  
452, 1/11/2010  
453, 9/11/2010  
454, 17/11/2010  
455, 25/11/2010  
456, 3/12/2010  
457, 11/12/2010  
458, 19/12/2010  
459, 27/12/2010  
460, 1/1/2011  
461, 9/1/2011  
462, 17/1/2011  
463, 25/1/2011  
464, 2/2/2011  
465, 10/2/2011  
466, 18/2/2011  
467, 26/2/2011  
468, 6/3/2011  
469, 14/3/2011  
470, 22/3/2011  
471, 30/3/2011  
472, 7/4/2011  
473, 15/4/2011  
474, 23/4/2011  
475, 1/5/2011  
476, 9/5/2011  
477, 17/5/2011  
478, 25/5/2011  
479, 2/6/2011  
480, 10/6/2011  
481, 18/6/2011  
482, 26/6/2011  
483, 4/7/2011  
484, 12/7/2011  
485, 20/7/2011  
486, 28/7/2011  
487, 5/8/2011  
488, 13/8/2011  
489, 21/8/2011  
490, 29/8/2011  
491, 6/9/2011  
492, 14/9/2011  
493, 22/9/2011  
494, 30/9/2011  
495, 8/10/2011  
496, 16/10/2011  
497, 24/10/2011  
498, 1/11/2011  
499, 9/11/2011

500, 17/11/2011  
501, 25/11/2011  
502, 3/12/2011  
503, 11/12/2011  
504, 19/12/2011  
505, 27/12/2011  
506, 1/1/2012  
507, 9/1/2012  
508, 17/1/2012  
509, 25/1/2012  
510, 2/2/2012  
511, 10/2/2012  
512, 18/2/2012  
513, 26/2/2012  
514, 5/3/2012  
515, 13/3/2012  
516, 21/3/2012  
517, 29/3/2012  
518, 6/4/2012  
519, 14/4/2012  
520, 22/4/2012  
521, 30/4/2012  
522, 8/5/2012  
523, 16/5/2012  
524, 24/5/2012  
525, 1/6/2012  
526, 9/6/2012  
527, 17/6/2012  
528, 25/6/2012  
529, 3/7/2012  
530, 11/7/2012  
531, 19/7/2012  
532, 27/7/2012  
533, 4/8/2012  
534, 12/8/2012  
535, 20/8/2012  
536, 28/8/2012  
537, 5/9/2012  
538, 13/9/2012  
539, 21/9/2012  
540, 29/9/2012  
541, 7/10/2012  
542, 15/10/2012  
543, 23/10/2012  
544, 31/10/2012  
545, 8/11/2012  
546, 16/11/2012  
547, 24/11/2012  
548, 2/12/2012  
549, 10/12/2012

550, 18/12/2012  
551, 26/12/2012  
552, 1/1/2013  
553, 9/1/2013  
554, 17/1/2013  
555, 25/1/2013  
556, 2/2/2013  
557, 10/2/2013  
558, 18/2/2013  
559, 26/2/2013  
560, 6/3/2013  
561, 14/3/2013  
562, 22/3/2013  
563, 30/3/2013  
564, 7/4/2013  
565, 15/4/2013  
566, 23/4/2013  
567, 1/5/2013  
568, 9/5/2013  
569, 17/5/2013  
570, 25/5/2013  
571, 2/6/2013  
572, 10/6/2013  
573, 18/6/2013  
574, 26/6/2013  
575, 4/7/2013  
576, 12/7/2013  
577, 20/7/2013  
578, 28/7/2013  
579, 5/8/2013  
580, 13/8/2013  
581, 21/8/2013  
582, 29/8/2013  
583, 6/9/2013  
584, 14/9/2013  
585, 22/9/2013  
586, 30/9/2013  
587, 8/10/2013  
588, 16/10/2013  
589, 24/10/2013  
590, 1/11/2013  
591, 9/11/2013  
592, 17/11/2013  
593, 25/11/2013  
594, 3/12/2013  
595, 11/12/2013  
596, 19/12/2013  
597, 27/12/2013  
598, 1/1/2014  
599, 9/1/2014

600, 17/1/2014  
601, 25/1/2014  
602, 2/2/2014  
603, 10/2/2014  
604, 18/2/2014  
605, 26/2/2014  
606, 6/3/2014  
607, 14/3/2014  
608, 22/3/2014  
609, 30/3/2014  
610, 7/4/2014  
611, 15/4/2014  
612, 23/4/2014  
613, 1/5/2014  
614, 9/5/2014  
615, 17/5/2014  
616, 25/5/2014  
617, 2/6/2014  
618, 10/6/2014  
619, 18/6/2014  
620, 26/6/2014  
621, 4/7/2014  
622, 12/7/2014  
623, 20/7/2014  
624, 28/7/2014  
625, 5/8/2014  
626, 13/8/2014  
627, 21/8/2014  
628, 29/8/2014  
629, 6/9/2014  
630, 14/9/2014  
631, 22/9/2014  
632, 30/9/2014  
633, 8/10/2014  
634, 16/10/2014  
635, 24/10/2014  
636, 1/11/2014  
637, 9/11/2014  
638, 17/11/2014  
639, 25/11/2014  
640, 3/12/2014  
641, 11/12/2014  
642, 19/12/2014  
643, 27/12/2014  
644, 1/1/2015  
645, 9/1/2015  
646, 17/1/2015  
647, 25/1/2015  
648, 2/2/2015  
649, 10/2/2015

650, 18/2/2015  
651, 26/2/2015  
652, 6/3/2015  
653, 14/3/2015  
654, 22/3/2015  
655, 30/3/2015  
656, 7/4/2015  
657, 15/4/2015  
658, 23/4/2015  
659, 1/5/2015  
660, 9/5/2015  
661, 17/5/2015  
662, 25/5/2015  
663, 2/6/2015  
664, 10/6/2015  
665, 18/6/2015  
666, 26/6/2015  
667, 4/7/2015  
668, 12/7/2015  
669, 20/7/2015  
670, 28/7/2015  
671, 5/8/2015  
672, 13/8/2015  
673, 21/8/2015  
674, 29/8/2015  
675, 6/9/2015  
676, 14/9/2015  
677, 22/9/2015  
678, 30/9/2015  
679, 8/10/2015  
680, 16/10/2015  
681, 24/10/2015  
682, 1/11/2015  
683, 9/11/2015  
684, 17/11/2015  
685, 25/11/2015  
686, 3/12/2015  
687, 11/12/2015  
688, 19/12/2015  
689, 27/12/2015  
690, 1/1/2016  
691, 9/1/2016  
692, 17/1/2016  
693, 25/1/2016  
694, 2/2/2016  
695, 10/2/2016  
696, 18/2/2016  
697, 26/2/2016  
698, 5/3/2016  
699, 13/3/2016

700, 21/3/2016  
701, 29/3/2016  
702, 6/4/2016  
703, 14/4/2016  
704, 22/4/2016  
705, 30/4/2016  
706, 8/5/2016  
707, 16/5/2016  
708, 24/5/2016  
709, 1/6/2016  
710, 9/6/2016  
711, 17/6/2016  
712, 25/6/2016  
713, 3/7/2016  
714, 11/7/2016  
715, 19/7/2016  
716, 27/7/2016  
717, 4/8/2016  
718, 12/8/2016  
719, 20/8/2016  
720, 28/8/2016  
721, 5/9/2016  
722, 13/9/2016  
723, 21/9/2016  
724, 29/9/2016  
725, 7/10/2016  
726, 15/10/2016  
727, 23/10/2016  
728, 31/10/2016  
729, 8/11/2016  
730, 16/11/2016  
731, 24/11/2016  
732, 2/12/2016  
733, 10/12/2016  
734, 18/12/2016  
735, 26/12/2016  
736, 1/1/2017  
737, 9/1/2017  
738, 17/1/2017  
739, 25/1/2017  
740, 2/2/2017  
741, 10/2/2017  
742, 18/2/2017  
743, 26/2/2017  
744, 6/3/2017  
745, 14/3/2017  
746, 22/3/2017  
747, 30/3/2017  
748, 7/4/2017  
749, 15/4/2017

750, 23/4/2017  
751, 1/5/2017  
752, 9/5/2017  
753, 17/5/2017  
754, 25/5/2017  
755, 2/6/2017  
756, 10/6/2017  
757, 18/6/2017  
758, 26/6/2017  
759, 4/7/2017  
760, 12/7/2017  
761, 20/7/2017  
762, 28/7/2017  
763, 5/8/2017  
764, 13/8/2017  
765, 21/8/2017  
766, 29/8/2017  
767, 6/9/2017  
768, 14/9/2017  
769, 22/9/2017  
770, 30/9/2017  
771, 8/10/2017  
772, 16/10/2017  
773, 24/10/2017  
774, 1/11/2017  
775, 9/11/2017  
776, 17/11/2017  
777, 25/11/2017  
778, 3/12/2017  
779, 11/12/2017  
780, 19/12/2017  
781, 27/12/2017  
782, 1/1/2018  
783, 9/1/2018  
784, 17/1/2018  
785, 25/1/2018  
786, 2/2/2018  
787, 10/2/2018  
788, 18/2/2018  
789, 26/2/2018  
790, 6/3/2018  
791, 14/3/2018  
792, 22/3/2018  
793, 30/3/2018  
794, 7/4/2018  
795, 15/4/2018  
796, 23/4/2018  
797, 1/5/2018  
798, 9/5/2018  
799, 17/5/2018

800, 25/5/2018  
801, 2/6/2018  
802, 10/6/2018  
803, 18/6/2018  
804, 26/6/2018  
805, 4/7/2018  
806, 12/7/2018  
807, 20/7/2018  
808, 28/7/2018  
809, 5/8/2018  
810, 13/8/2018  
811, 21/8/2018  
812, 29/8/2018  
813, 6/9/2018  
814, 14/9/2018  
815, 22/9/2018  
816, 30/9/2018  
817, 8/10/2018  
818, 16/10/2018  
819, 24/10/2018  
820, 1/11/2018  
821, 9/11/2018  
822, 17/11/2018  
823, 25/11/2018  
824, 3/12/2018  
825, 11/12/2018  
826, 19/12/2018  
827, 27/12/2018  
828, 1/1/2019  
829, 9/1/2019  
830, 17/1/2019  
831, 25/1/2019  
832, 2/2/2019  
833, 10/2/2019  
834, 18/2/2019  
835, 26/2/2019  
836, 6/3/2019  
837, 14/3/2019  
838, 22/3/2019  
839, 30/3/2019  
840, 7/4/2019  
841, 15/4/2019  
842, 23/4/2019  
843, 1/5/2019  
844, 9/5/2019  
845, 17/5/2019  
846, 25/5/2019  
847, 2/6/2019  
848, 10/6/2019  
849, 18/6/2019

850, 26/6/2019  
851, 4/7/2019  
852, 12/7/2019  
853, 20/7/2019  
854, 28/7/2019  
855, 5/8/2019  
856, 13/8/2019  
857, 21/8/2019  
858, 29/8/2019  
859, 6/9/2019  
860, 14/9/2019  
861, 22/9/2019  
862, 30/9/2019  
863, 8/10/2019  
864, 16/10/2019  
865, 24/10/2019  
866, 1/11/2019  
867, 9/11/2019  
868, 17/11/2019  
869, 25/11/2019  
870, 3/12/2019  
871, 11/12/2019  
872, 19/12/2019  
873, 27/12/2019
