# Supplementary material
Source: MDPI journal article supplement (https://www.mdpi.com/2220-9964/9/12/735)
Supplement: s1 [file s1 › Supplementary Information/Supplementary Information S5.pdf]

## Supplementary Information S5 - Linear Mixed Model Effects and post-hoc ANOVA results

---

### Definitions

mod0: “null-model “with intercept-only effect

mod1: model including a single fixed-effect term related to the set of predictive variables used in SDM’s

Response variable is named “TestEvalValue” i.e., the performance score for either TSS, ROC or KAPPA

Fixed effect: “set” i.e. the name of the set of predictive variables, either: combined climate and EFA (“CLIM\_EFA”), climate-only (“CLIM\_only”) or EFA-only (“EFA\_only”)

Random factors are: “Species” (species name: 13 in total) and “EvalMetrics” (the evaluation score type: 3 in total, TSS, ROC and KAPPA)

### Model results

---

Model formulae used in R lmer function:

mod0: TestEvalValue ~ 1 + (1 | Species) + (1 | EvalMetrics)

mod1: TestEvalValue ~ set + (1 | Species) + (1 | EvalMetrics)

Table 1 - Scaled residuals

| Minimum | 1 <sup>st</sup> Quartile<br>(25%) | Median<br>(50%) | 3 <sup>rd</sup> Quartile<br>(75%) | Maximum |
|---------|-----------------------------------|-----------------|-----------------------------------|---------|
| -2.436  | -0.477                            | 0.018           | 0.681                             | 2.488   |

Figure 1 - Histogram of residuals

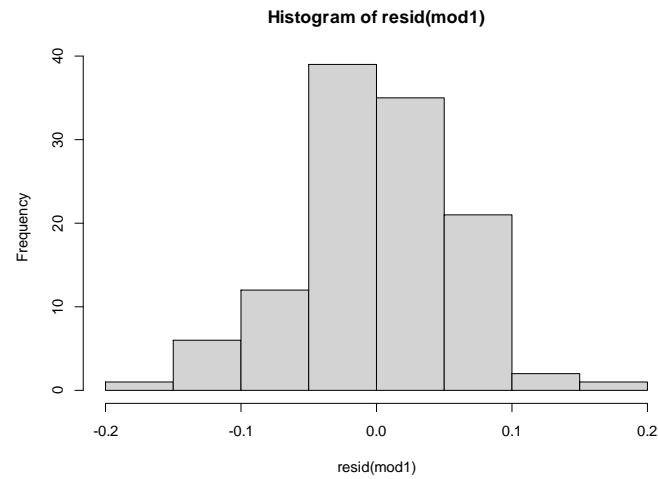

**Table 2** – Random effects estimates

| Groups      | Name        | Variance | Std.Dev. |
|-------------|-------------|----------|----------|
| Species     | (Intercept) | 0.005    | 0.074    |
| EvalMetrics | (Intercept) | 0.024    | 0.155    |
| Residual    |             | 0.004    | 0.062    |

Number of observations: 117, groups: Species, 13; EvalMetrics, 3

Results show overall greater variation in performance scores across evaluation metrics than across species.

**Table 3** – Fixed effects estimates

| Model term      | Estimate | Std. Error | t-value |
|-----------------|----------|------------|---------|
| (Intercept)     | 0.858    | 0.093      | 9.274   |
| set [CLIM_only] | -0.018   | 0.015      | -1.298  |
| set [EFA_only]  | -0.124   | 0.014      | -8.715  |

**Figure 2** – Linear mixed model results

(a)

(b)

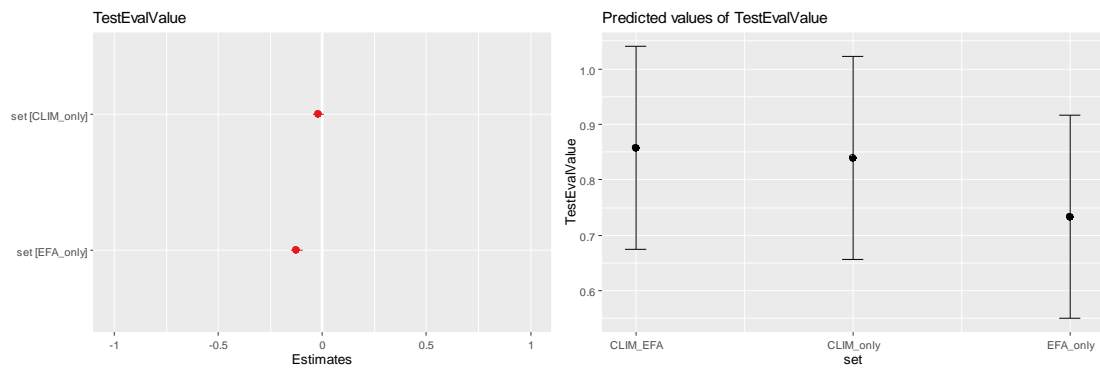

Diagnostic: negative model coefficients (Table 3 and Fig. 2 – a) show that (despite uncertainty in coefficient estimates) the set[CLIM\_only] and set[EFA\_only] both have on average less performant models in relation to the combined set[CLIM\_EFA]. That effect is more noticeable for the EFA\_only set (Fig. 2 – b).

#### ANOVA results:

```
mod0 <- lmer(TestEvalValue ~ 1 + (1|Species) + (1|EvalMetrics), data = perfEvalAll)
mod1 <- lmer(TestEvalValue ~ set + (1|Species) + (1|EvalMetrics), data = perfEvalAll)
anova(mod0, mod1)
```

**Table 4** – ANOVA post-hoc test results

| Model       | Number of parameters | AIC     | BIC     | Log likelihood | Deviance | Chi-square test value | Degrees of freedom | Pr(>Chisq)                                           |
|-------------|----------------------|---------|---------|----------------|----------|-----------------------|--------------------|------------------------------------------------------|
| <u>mod0</u> | 4                    | -198.19 | -187.14 | 103.09         | -206.19  |                       |                    |                                                      |
| <u>mod1</u> | 6                    | -258.81 | -242.24 | 135.41         | -270.81  | 64.62                 | 2                  | <u><math>p=9.269 \times 10^{-15}</math></u><br>(***) |

Significance codes: 0 '\*\*\*' 0.001 '\*\*' 0.01 '\*' 0.05 '.' 0.1 ' ' 1

Diagnostic: the model including the “set” term (mod1) is significant at  $p < 0.001$

**Data used for analysis** (Appendix S6)
