# Supplementary material
Source: MDPI journal article supplement (https://www.mdpi.com/2220-9964/9/12/735)
Supplement: s1 [file s1 › Supplementary Information/Supplementary Information S6.pdf]

**Supplementary Information S6** – GLM AICc-based model ranking. Models signalled with an asterisk (\*) in bold are the best models for each species (i.e., lowest values) according to different sets of variables: CLIM – models only with climatic variables, EFA – only satellite-based Ecosystem Functioning Attributes (EFA), and CLIM\_EFA – combined models using both climate and EFA variables. \* Narrow distributed; \*\* Endemic

| Species name                     | Group of predictor variables | AICc value     |
|----------------------------------|------------------------------|----------------|
| <i>Quercus broteroi</i>          | <b>CLIM_EFA (*)</b>          | <b>797.57</b>  |
|                                  | CLIM                         | 883.66         |
|                                  | EFA                          | 1049.73        |
| <i>Quercus canariensis</i> *     | <b>CLIM_EFA (*)</b>          | <b>214.43</b>  |
|                                  | EFA                          | 356.75         |
|                                  | CLIM                         | 431.02         |
| <i>Quercus xcerrioides</i> **    | <b>CLIM_EFA (*)</b>          | <b>8.13</b>    |
|                                  | CLIM                         | 10.19          |
|                                  | EFA                          | 97.58          |
| <i>Quercus estremadurensis</i> * | <b>CLIM (*)</b>              | <b>190.11</b>  |
|                                  | CLIM_EFA                     | 193.88         |
|                                  | EFA                          | 284.12         |
| <i>Quercus faginea</i>           | <b>EFA (*)</b>               | <b>1263.09</b> |
|                                  | CLIM_EFA                     | 1674.71        |
|                                  | CLIM                         | 1903.16        |
| <i>Quercus lusitanica</i> *      | <b>CLIM_EFA (*)</b>          | <b>440.53</b>  |
|                                  | CLIM                         | 554.18         |
|                                  | EFA                          | 714.17         |
| <i>Quercus marianica</i> **      | <b>CLIM_EFA (*)</b>          | <b>186.03</b>  |
|                                  | CLIM                         | 276.67         |
|                                  | EFA                          | 327.38         |
| <i>Quercus orocantabrica</i> **  | <b>CLIM_EFA (*)</b>          | <b>20.96</b>   |
|                                  | CLIM                         | 73.11          |
|                                  | EFA                          | 84.93          |
| <i>Quercus petraea</i>           | <b>EFA (*)</b>               | <b>1153.95</b> |
|                                  | CLIM_EFA                     | 1591.95        |
|                                  | CLIM                         | 1811.36        |
| <i>Quercus pubescens</i>         | <b>CLIM_EFA (*)</b>          | <b>1041.36</b> |
|                                  | CLIM                         | 1173.35        |
|                                  | EFA                          | 1185.59        |
| <i>Quercus pyrenaica</i>         | <b>CLIM_EFA (*)</b>          | <b>5119.22</b> |
|                                  | CLIM                         | 5510.87        |

|                               |                     |                |
|-------------------------------|---------------------|----------------|
|                               | EFA                 | 7145.01        |
|                               | <b>EFA (*)</b>      | <b>1448.22</b> |
| <i>Quercus robur</i>          | CLIM_EFA            | 1642.69        |
|                               | CLIM                | 1715.53        |
|                               | <b>CLIM_EFA (*)</b> | <b>915.54</b>  |
| <i>Quercus subpyrenaica**</i> | CLIM                | 1002.90        |
|                               | EFA                 | 1332.10        |
|                               |                     |                |
