# Supplementary material
Source: MDPI journal article supplement (https://www.mdpi.com/2220-9964/9/12/735)
Supplement: s1 [file s1 › Supplementary Information/Supplementary Information S7.pdf]

**Supplementary Information S7 – Model performance results by species and set of predictive variables.**

| Set of variables | Species | Eval. Metric | Eval. Metric value | Cutoff | Sensitivity | Specificity |
|------------------|---------|--------------|--------------------|--------|-------------|-------------|
| CLIM_EFA         | Qbrot   | KAPPA        | 0.70               | 805    | 84.0        | 96.3        |
| CLIM_EFA         | Qbrot   | TSS          | 0.86               | 603    | 93.5        | 92.4        |
| CLIM_EFA         | Qbrot   | ROC          | 0.98               | 611    | 93.5        | 92.7        |
| CLIM_EFA         | Qcan    | KAPPA        | 0.78               | 765    | 84.3        | 99.3        |
| CLIM_EFA         | Qcan    | TSS          | 0.98               | 537    | 100.0       | 97.5        |
| CLIM_EFA         | Qcan    | ROC          | 1.00               | 541    | 100.0       | 97.6        |
| CLIM_EFA         | Qcerr   | KAPPA        | 0.97               | 851    | 94.4        | 100.0       |
| CLIM_EFA         | Qcerr   | TSS          | 1.00               | 763    | 100.0       | 99.9        |
| CLIM_EFA         | Qcerr   | ROC          | 1.00               | 762    | 100.0       | 99.9        |
| CLIM_EFA         | Qest    | KAPPA        | 0.66               | 804    | 79.1        | 98.4        |
| CLIM_EFA         | Qest    | TSS          | 0.96               | 534    | 100.0       | 95.8        |
| CLIM_EFA         | Qest    | ROC          | 0.99               | 542    | 100.0       | 95.8        |
| CLIM_EFA         | Qfag    | KAPPA        | 0.56               | 714    | 58.3        | 97.0        |
| CLIM_EFA         | Qfag    | TSS          | 0.71               | 560    | 83.7        | 86.6        |
| CLIM_EFA         | Qfag    | ROC          | 0.93               | 566    | 83.3        | 87.3        |
| CLIM_EFA         | Qlus    | KAPPA        | 0.72               | 886    | 73.5        | 98.4        |
| CLIM_EFA         | Qlus    | TSS          | 0.93               | 577    | 97.6        | 95.0        |
| CLIM_EFA         | Qlus    | ROC          | 0.99               | 576    | 97.6        | 95.0        |
| CLIM_EFA         | Qmar    | KAPPA        | 0.75               | 844    | 81.8        | 98.6        |
| CLIM_EFA         | Qmar    | TSS          | 0.92               | 421    | 100.0       | 92.4        |
| CLIM_EFA         | Qmar    | ROC          | 0.99               | 429    | 100.0       | 92.6        |
| CLIM_EFA         | Qoro    | KAPPA        | 0.89               | 782    | 90.9        | 99.6        |
| CLIM_EFA         | Qoro    | TSS          | 0.97               | 510    | 100.0       | 97.2        |
| CLIM_EFA         | Qoro    | ROC          | 1.00               | 511    | 100.0       | 97.2        |
| CLIM_EFA         | Qpet    | KAPPA        | 0.68               | 806    | 79.6        | 95.0        |
| CLIM_EFA         | Qpet    | TSS          | 0.81               | 523    | 94.0        | 87.1        |
| CLIM_EFA         | Qpet    | ROC          | 0.97               | 522    | 94.2        | 87.1        |
| CLIM_EFA         | Qpub    | KAPPA        | 0.73               | 831    | 78.6        | 97.9        |
| CLIM_EFA         | Qpub    | TSS          | 0.88               | 495    | 97.5        | 90.9        |
| CLIM_EFA         | Qpub    | ROC          | 0.98               | 551    | 96.3        | 92.2        |
| CLIM_EFA         | Qpyr    | KAPPA        | 0.56               | 677    | 74.5        | 87.1        |
| CLIM_EFA         | Qpyr    | TSS          | 0.66               | 542    | 86.7        | 79.4        |
| CLIM_EFA         | Qpyr    | ROC          | 0.91               | 462    | 90.8        | 75.3        |
| CLIM_EFA         | Qrob    | KAPPA        | 0.64               | 850    | 69.9        | 96.0        |
| CLIM_EFA         | Qrob    | TSS          | 0.83               | 519    | 96.2        | 86.8        |
| CLIM_EFA         | Qrob    | ROC          | 0.97               | 508    | 96.4        | 86.6        |
| CLIM_EFA         | Qsub    | KAPPA        | 0.76               | 749    | 80.5        | 97.6        |
| CLIM_EFA         | Qsub    | TSS          | 0.88               | 364    | 96.8        | 90.6        |
| CLIM_EFA         | Qsub    | ROC          | 0.98               | 365    | 96.8        | 90.7        |
| CLIM_only        | Qbrot   | KAPPA        | 0.68               | 866    | 73.3        | 97.4        |
| CLIM_only        | Qbrot   | TSS          | 0.84               | 550    | 93.5        | 90.7        |
| CLIM_only        | Qbrot   | ROC          | 0.98               | 551    | 93.5        | 90.8        |
| CLIM_only        | Qcan    | KAPPA        | 0.67               | 858    | 68.6        | 99.2        |
| CLIM_only        | Qcan    | TSS          | 0.90               | 576    | 96.1        | 94.2        |
| CLIM_only        | Qcan    | ROC          | 0.99               | 577    | 96.1        | 94.2        |
| CLIM_only        | Qcerr   | KAPPA        | 0.97               | 723    | 100.0       | 99.9        |
| CLIM_only        | Qcerr   | TSS          | 1.00               | 723    | 100.0       | 99.9        |
| CLIM_only        | Qcerr   | ROC          | 1.00               | 723    | 100.0       | 99.9        |

|           |       |       |      |     |       |      |
|-----------|-------|-------|------|-----|-------|------|
| CLIM_only | Qest  | KAPPA | 0.52 | 871 | 63.6  | 98.0 |
| CLIM_only | Qest  | TSS   | 0.91 | 490 | 100.0 | 91.4 |
| CLIM_only | Qest  | ROC   | 0.98 | 496 | 100.0 | 91.5 |
| CLIM_only | Qfag  | KAPPA | 0.51 | 703 | 60.0  | 95.7 |
| CLIM_only | Qfag  | TSS   | 0.70 | 491 | 89.3  | 80.7 |
| CLIM_only | Qfag  | ROC   | 0.93 | 497 | 89.0  | 81.1 |
| CLIM_only | Qlus  | KAPPA | 0.71 | 860 | 88.2  | 97.1 |
| CLIM_only | Qlus  | TSS   | 0.92 | 514 | 98.6  | 93.0 |
| CLIM_only | Qlus  | ROC   | 0.99 | 521 | 98.6  | 93.2 |
| CLIM_only | Qmar  | KAPPA | 0.74 | 847 | 80.3  | 98.7 |
| CLIM_only | Qmar  | TSS   | 0.91 | 526 | 97.0  | 94.3 |
| CLIM_only | Qmar  | ROC   | 0.99 | 526 | 97.0  | 94.3 |
| CLIM_only | Qoro  | KAPPA | 0.83 | 874 | 84.8  | 99.4 |
| CLIM_only | Qoro  | TSS   | 0.98 | 634 | 100.0 | 97.5 |
| CLIM_only | Qoro  | ROC   | 1.00 | 639 | 100.0 | 97.7 |
| CLIM_only | Qpet  | KAPPA | 0.64 | 744 | 76.9  | 94.5 |
| CLIM_only | Qpet  | TSS   | 0.81 | 464 | 94.0  | 86.8 |
| CLIM_only | Qpet  | ROC   | 0.96 | 461 | 94.1  | 86.7 |
| CLIM_only | Qpub  | KAPPA | 0.71 | 785 | 76.0  | 97.8 |
| CLIM_only | Qpub  | TSS   | 0.89 | 510 | 96.6  | 92.3 |
| CLIM_only | Qpub  | ROC   | 0.98 | 516 | 96.6  | 92.4 |
| CLIM_only | Qpyr  | KAPPA | 0.55 | 675 | 76.4  | 85.8 |
| CLIM_only | Qpyr  | TSS   | 0.66 | 448 | 92.7  | 73.6 |
| CLIM_only | Qpyr  | ROC   | 0.91 | 451 | 92.7  | 73.8 |
| CLIM_only | Qrob  | KAPPA | 0.62 | 850 | 71.2  | 95.3 |
| CLIM_only | Qrob  | TSS   | 0.83 | 598 | 95.3  | 87.7 |
| CLIM_only | Qrob  | ROC   | 0.96 | 588 | 95.5  | 87.6 |
| CLIM_only | Qsub  | KAPPA | 0.72 | 769 | 75.6  | 97.7 |
| CLIM_only | Qsub  | TSS   | 0.88 | 367 | 96.0  | 91.6 |
| CLIM_only | Qsub  | ROC   | 0.98 | 370 | 96.0  | 91.7 |
| EFA_only  | Qbrot | KAPPA | 0.49 | 729 | 62.1  | 92.7 |
| EFA_only  | Qbrot | TSS   | 0.67 | 490 | 85.6  | 81.0 |
| EFA_only  | Qbrot | ROC   | 0.90 | 491 | 85.6  | 81.2 |
| EFA_only  | Qcan  | KAPPA | 0.47 | 829 | 47.1  | 98.3 |
| EFA_only  | Qcan  | TSS   | 0.82 | 501 | 94.1  | 87.7 |
| EFA_only  | Qcan  | ROC   | 0.96 | 537 | 92.2  | 89.8 |
| EFA_only  | Qcerr | KAPPA | 0.75 | 794 | 77.8  | 99.5 |
| EFA_only  | Qcerr | TSS   | 0.95 | 498 | 100.0 | 95.2 |
| EFA_only  | Qcerr | ROC   | 0.99 | 506 | 100.0 | 95.4 |
| EFA_only  | Qest  | KAPPA | 0.47 | 744 | 67.4  | 95.5 |
| EFA_only  | Qest  | TSS   | 0.80 | 379 | 100.0 | 79.7 |
| EFA_only  | Qest  | ROC   | 0.95 | 381 | 100.0 | 79.7 |
| EFA_only  | Qfag  | KAPPA | 0.39 | 723 | 41.3  | 95.0 |
| EFA_only  | Qfag  | TSS   | 0.58 | 504 | 84.0  | 74.1 |
| EFA_only  | Qfag  | ROC   | 0.87 | 505 | 84.0  | 74.2 |
| EFA_only  | Qlus  | KAPPA | 0.49 | 733 | 61.4  | 94.5 |
| EFA_only  | Qlus  | TSS   | 0.73 | 432 | 92.4  | 80.4 |
| EFA_only  | Qlus  | ROC   | 0.93 | 437 | 92.4  | 80.8 |
| EFA_only  | Qmar  | KAPPA | 0.45 | 769 | 59.1  | 94.8 |
| EFA_only  | Qmar  | TSS   | 0.71 | 445 | 90.9  | 79.8 |

|          |      |       |      |     |       |      |
|----------|------|-------|------|-----|-------|------|
| EFA_only | Qmar | ROC   | 0.92 | 451 | 90.9  | 80.1 |
| EFA_only | Qoro | KAPPA | 0.80 | 795 | 81.8  | 98.9 |
| EFA_only | Qoro | TSS   | 0.92 | 434 | 100.0 | 92.1 |
| EFA_only | Qoro | ROC   | 0.99 | 431 | 100.0 | 92.1 |
| EFA_only | Qpet | KAPPA | 0.62 | 597 | 80.6  | 90.5 |
| EFA_only | Qpet | TSS   | 0.74 | 469 | 89.9  | 84.6 |
| EFA_only | Qpet | ROC   | 0.94 | 467 | 90.2  | 84.5 |
| EFA_only | Qpub | KAPPA | 0.58 | 764 | 58.5  | 96.9 |
| EFA_only | Qpub | TSS   | 0.71 | 478 | 90.3  | 80.7 |
| EFA_only | Qpub | ROC   | 0.94 | 487 | 90.0  | 81.1 |
| EFA_only | Qpyr | KAPPA | 0.49 | 611 | 71.2  | 81.4 |
| EFA_only | Qpyr | TSS   | 0.55 | 535 | 81.7  | 73.1 |
| EFA_only | Qpyr | ROC   | 0.86 | 536 | 81.7  | 73.3 |
| EFA_only | Qrob | KAPPA | 0.54 | 711 | 73.9  | 89.1 |
| EFA_only | Qrob | TSS   | 0.71 | 435 | 92.1  | 78.8 |
| EFA_only | Qrob | ROC   | 0.92 | 436 | 92.1  | 78.8 |
| EFA_only | Qsub | KAPPA | 0.48 | 749 | 55.4  | 93.8 |
| EFA_only | Qsub | TSS   | 0.64 | 556 | 84.4  | 79.9 |
| EFA_only | Qsub | ROC   | 0.90 | 553 | 84.9  | 79.6 |
