# Supplementary material
Source: MDPI journal article supplement (https://www.mdpi.com/2220-9964/9/12/735)

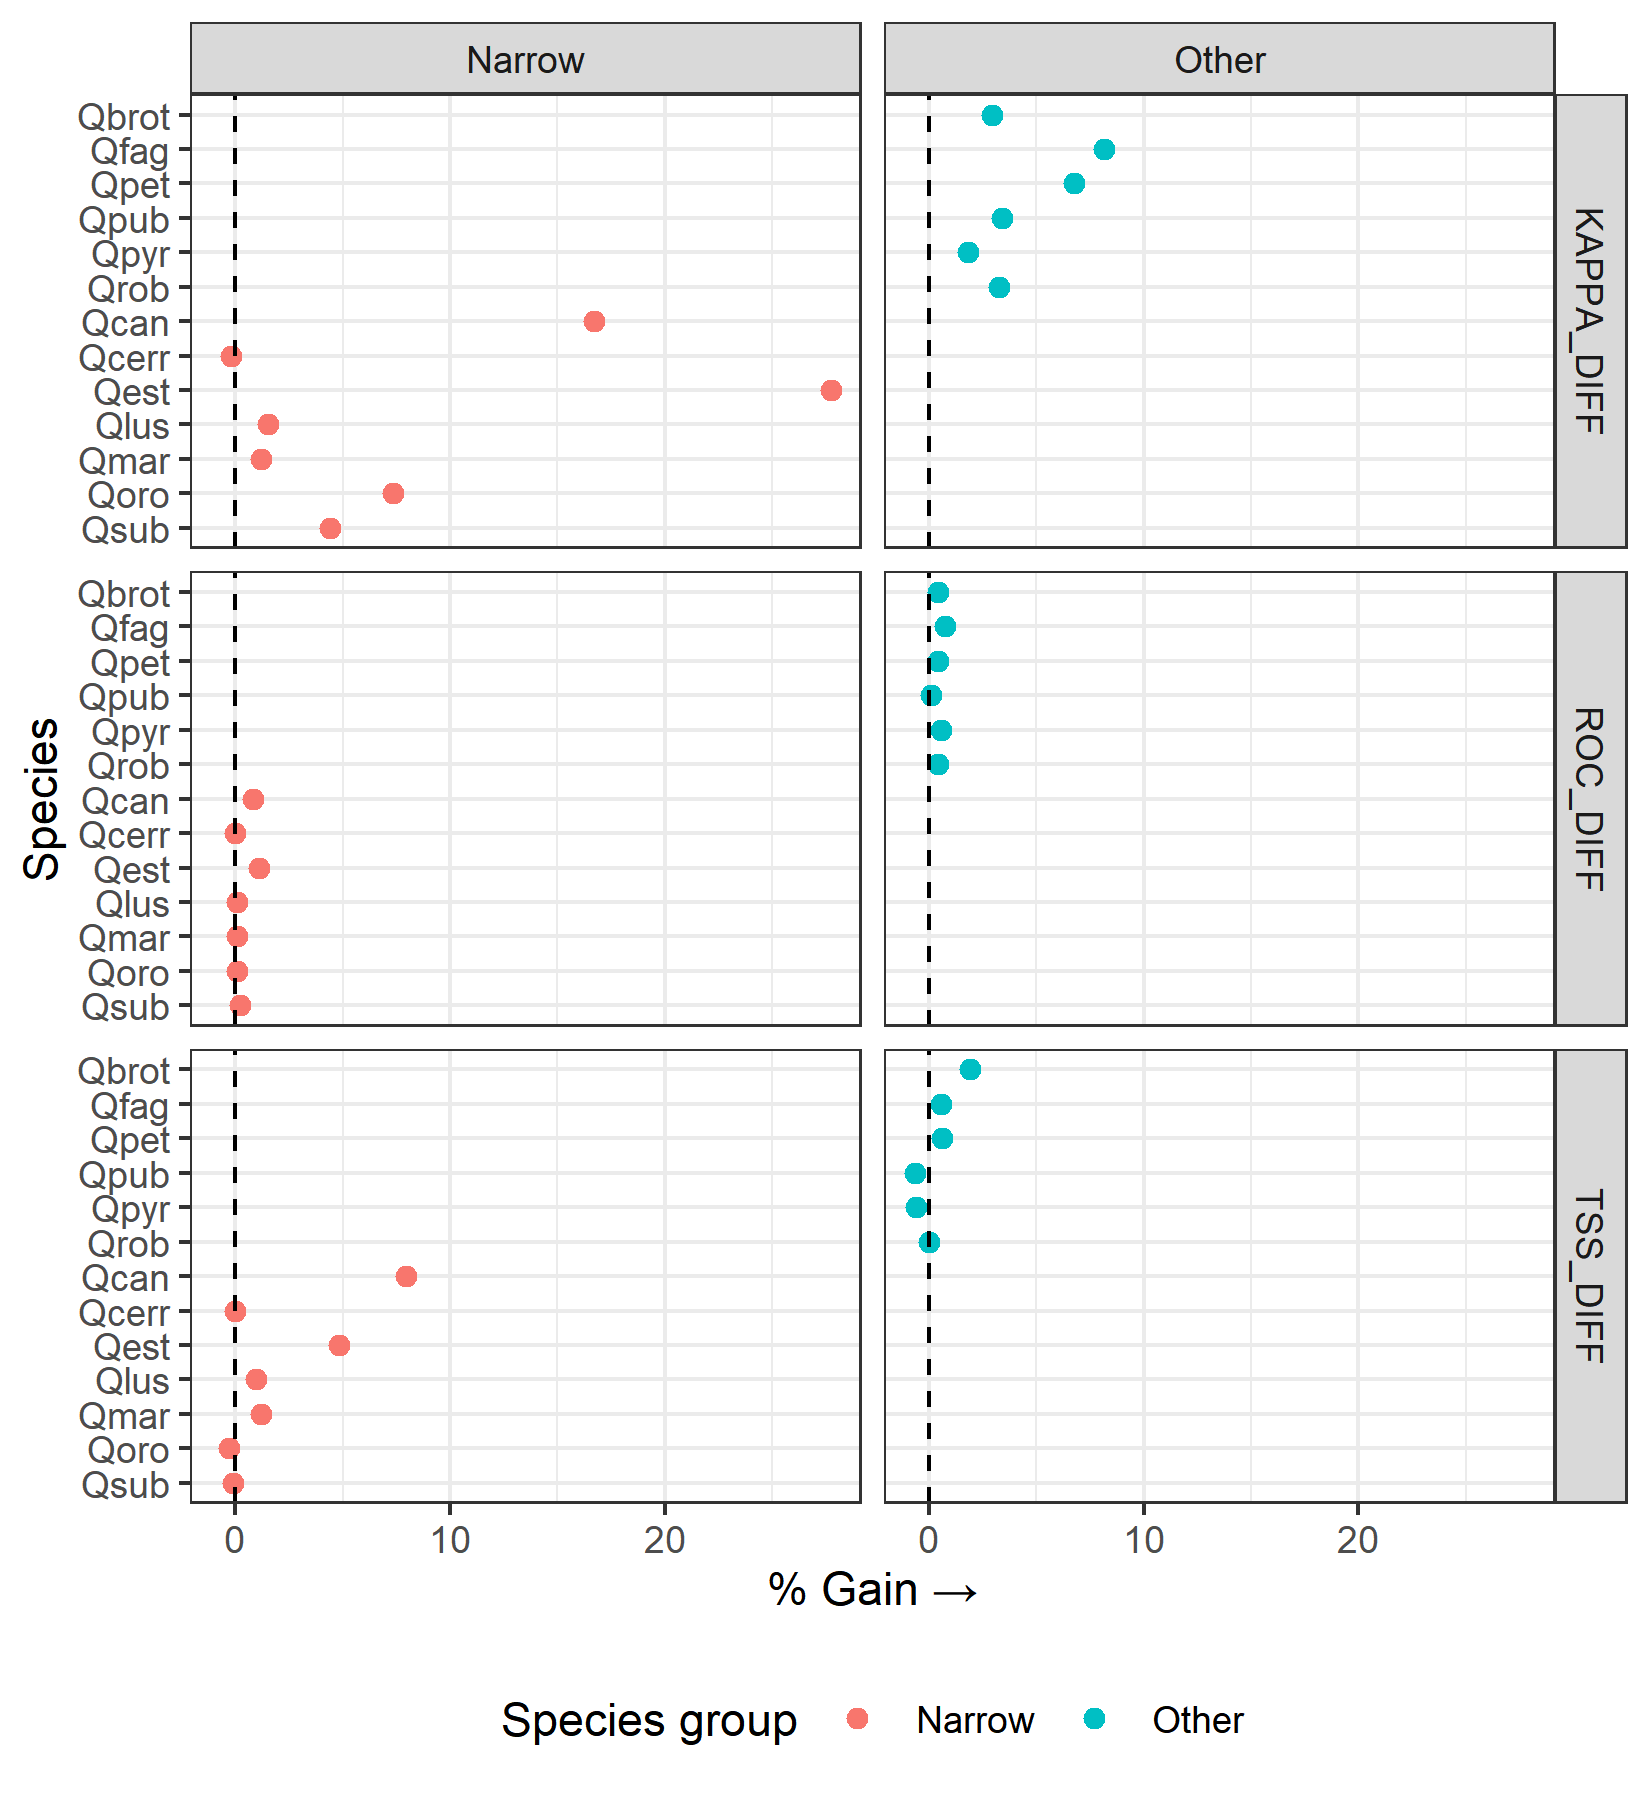

Supplement: s1 [file s1 › Appendix A/Figure A1.png]

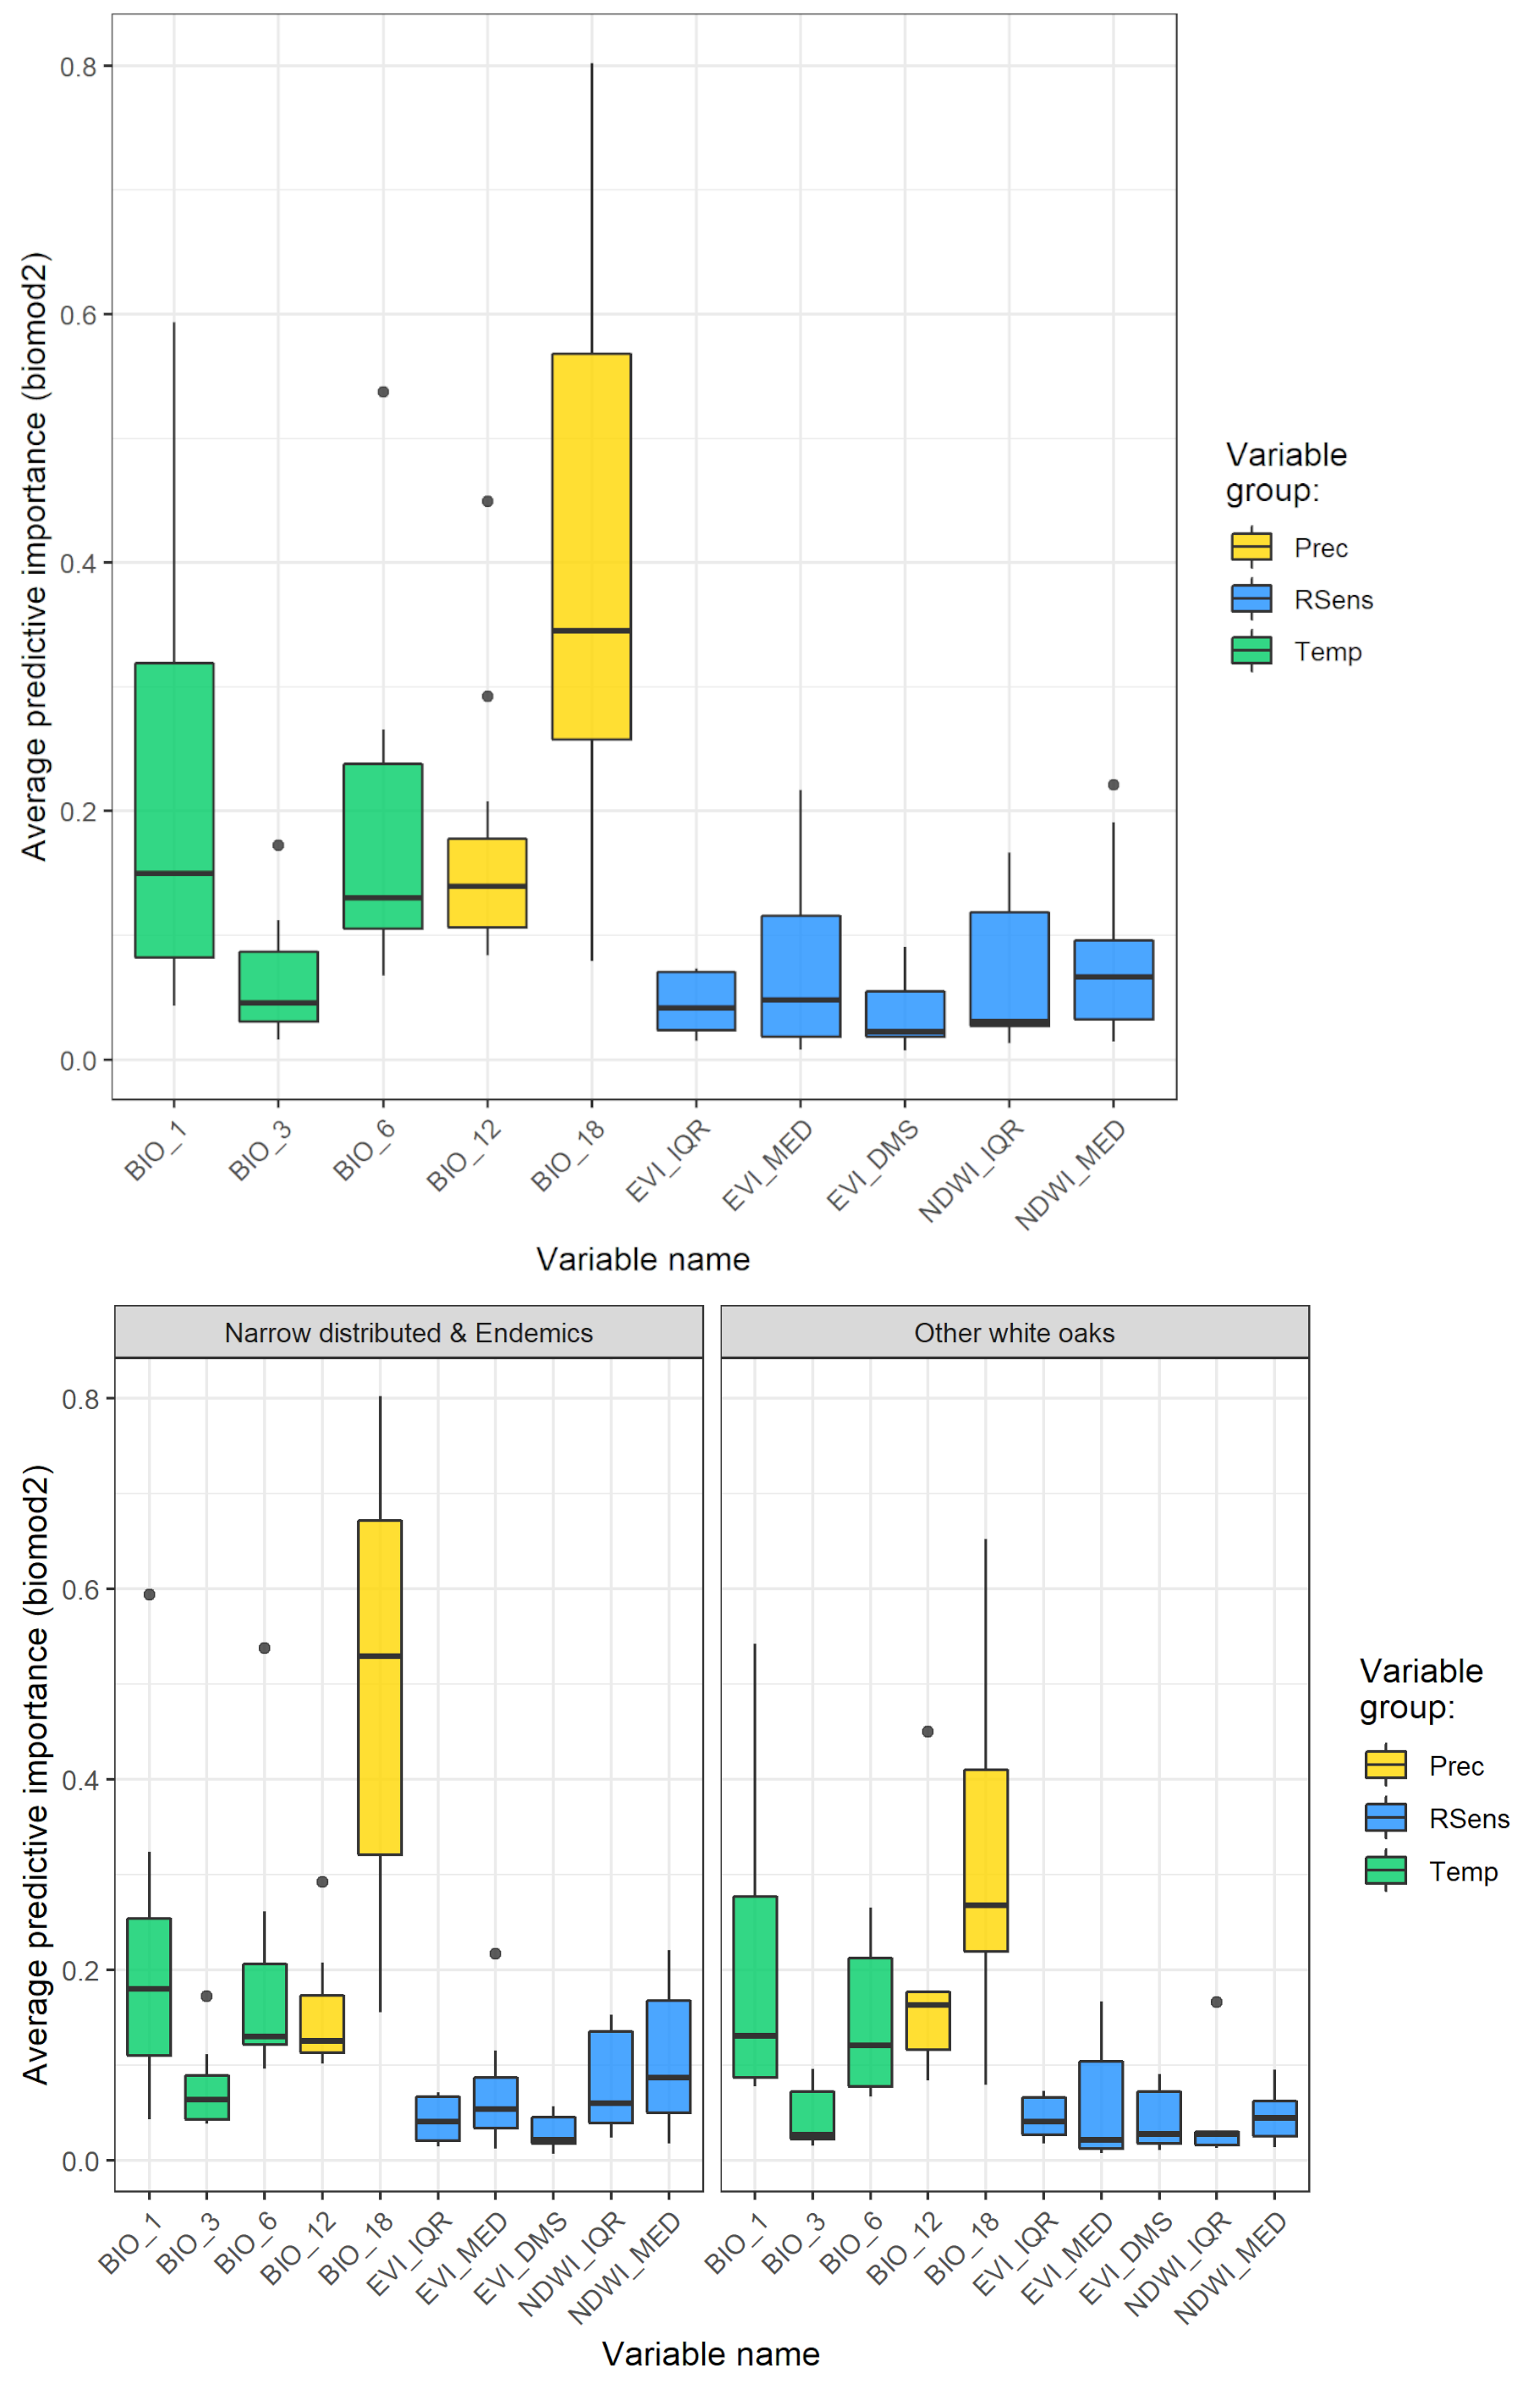

Supplement: s1 [file s1 › Appendix A/Figure A2.png]

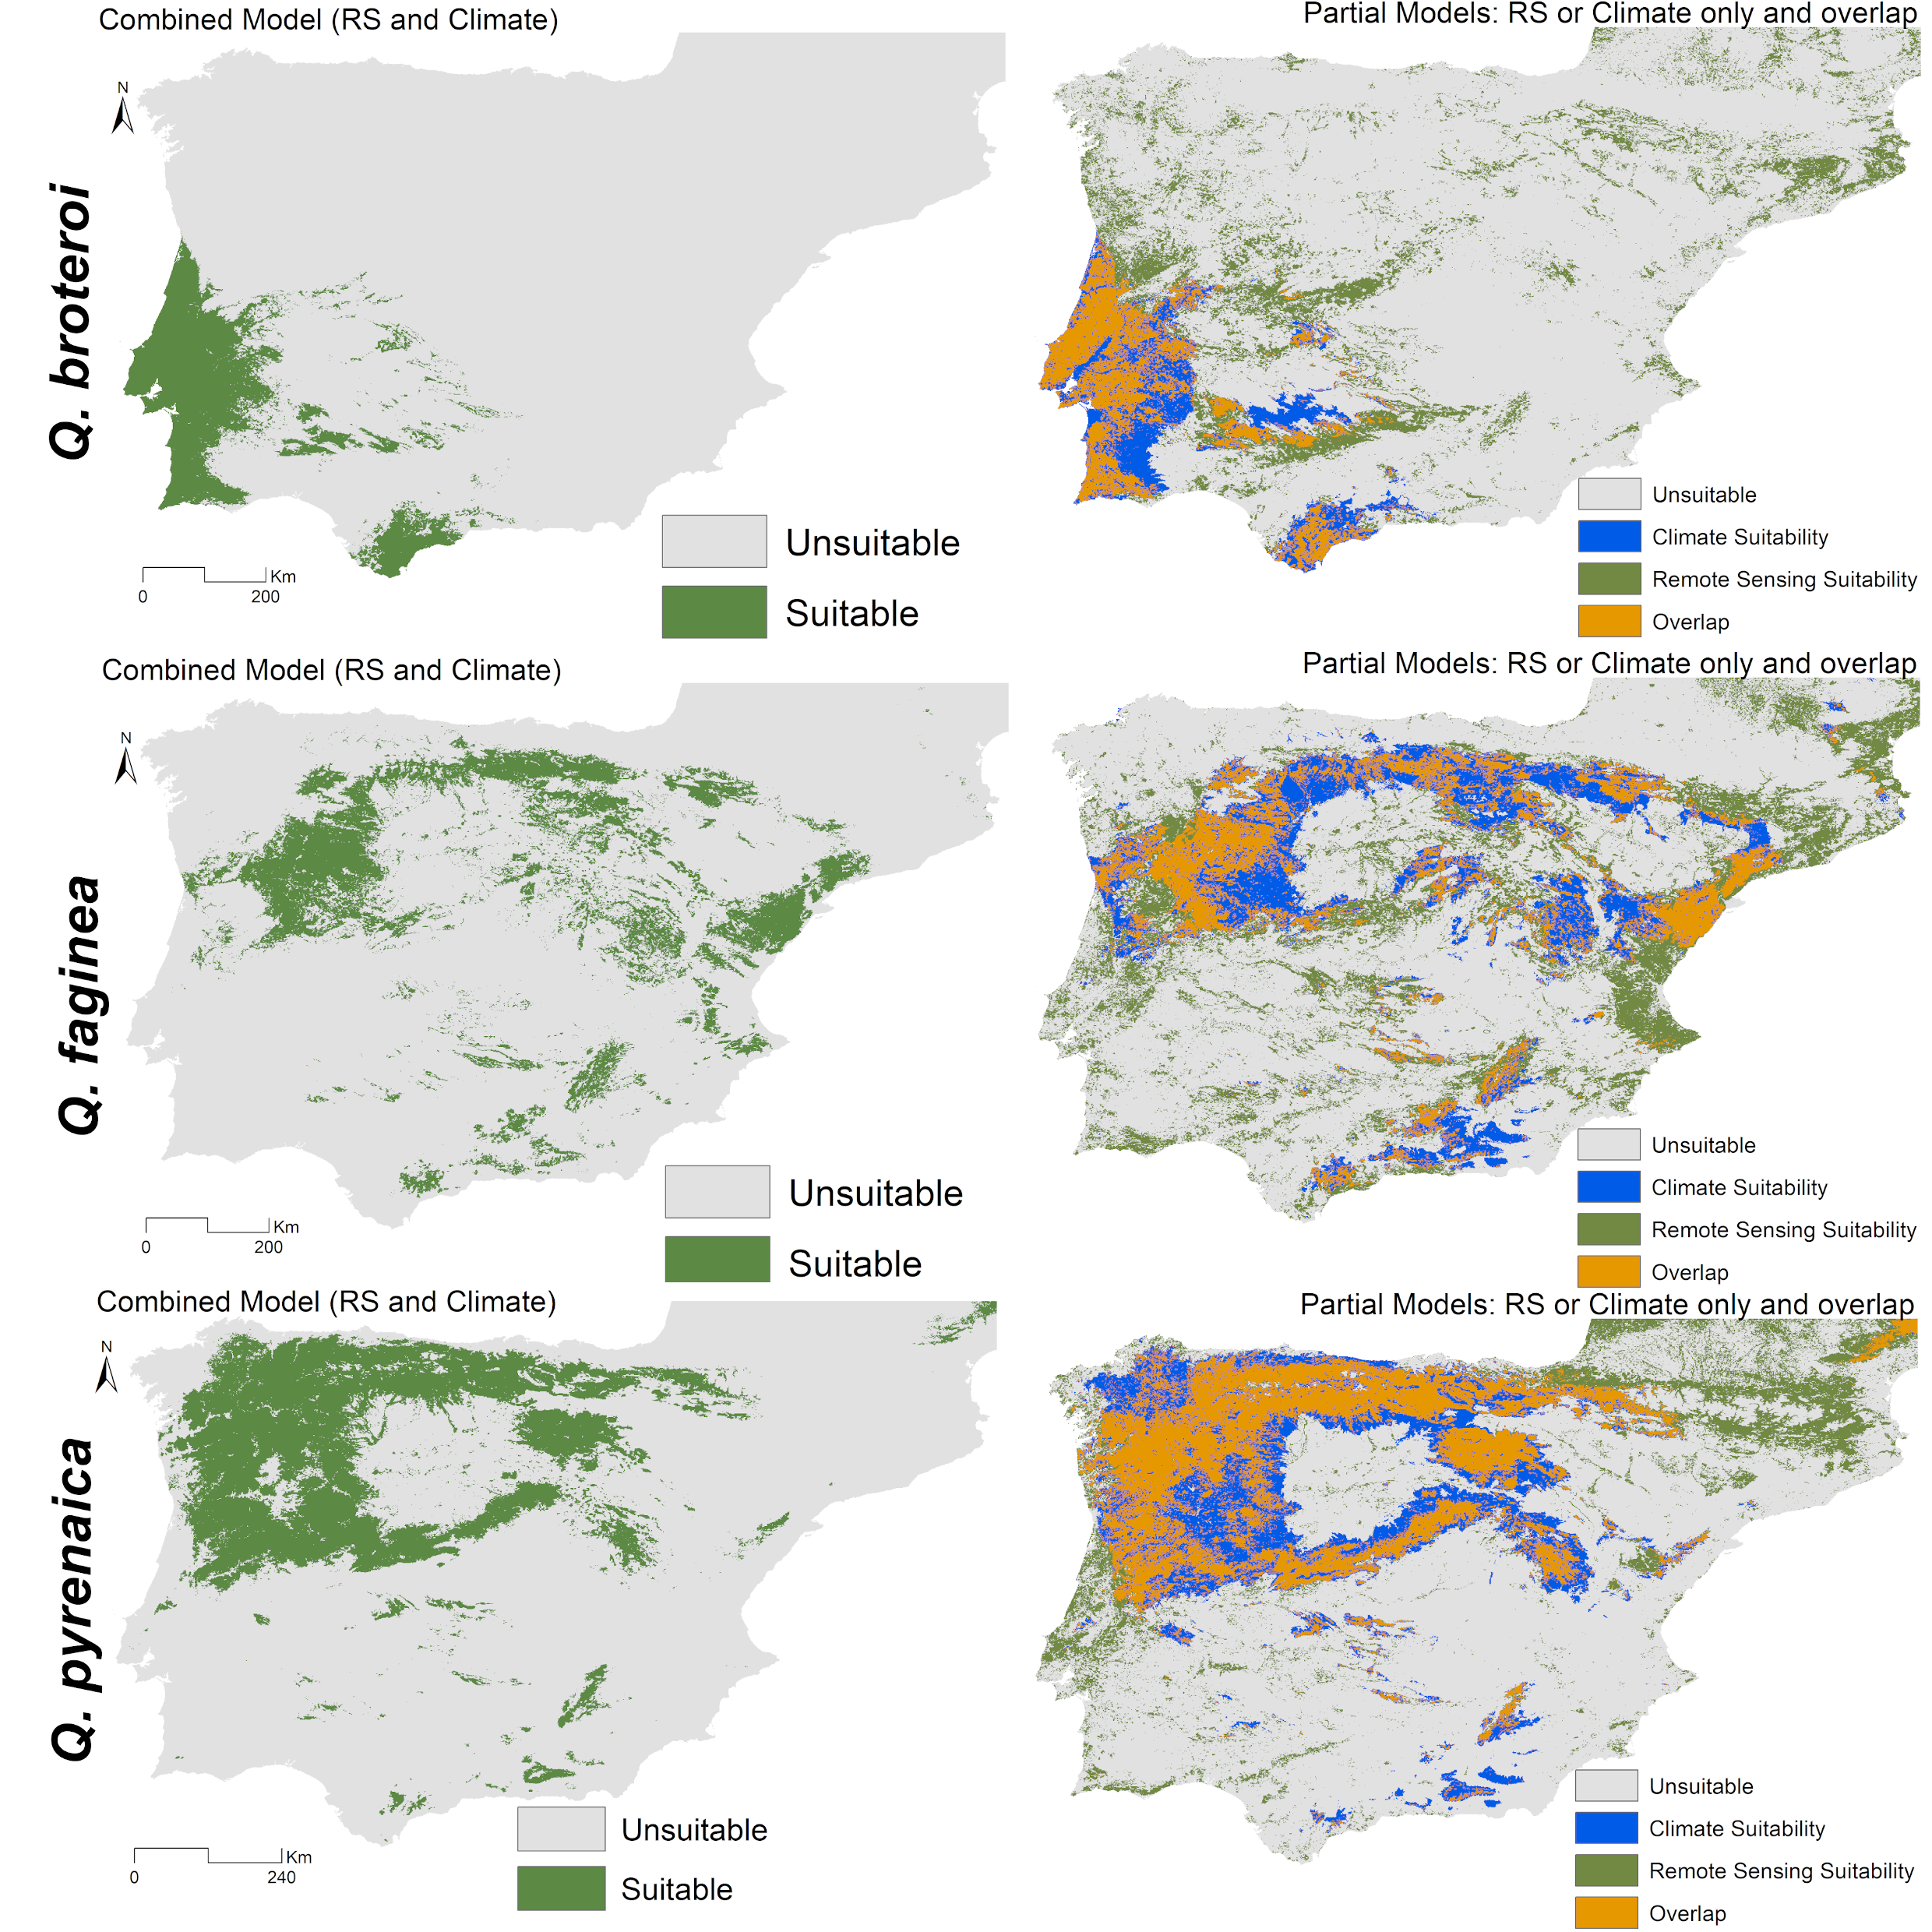

Supplement: s1 [file s1 › Appendix A/Figure A3.png]

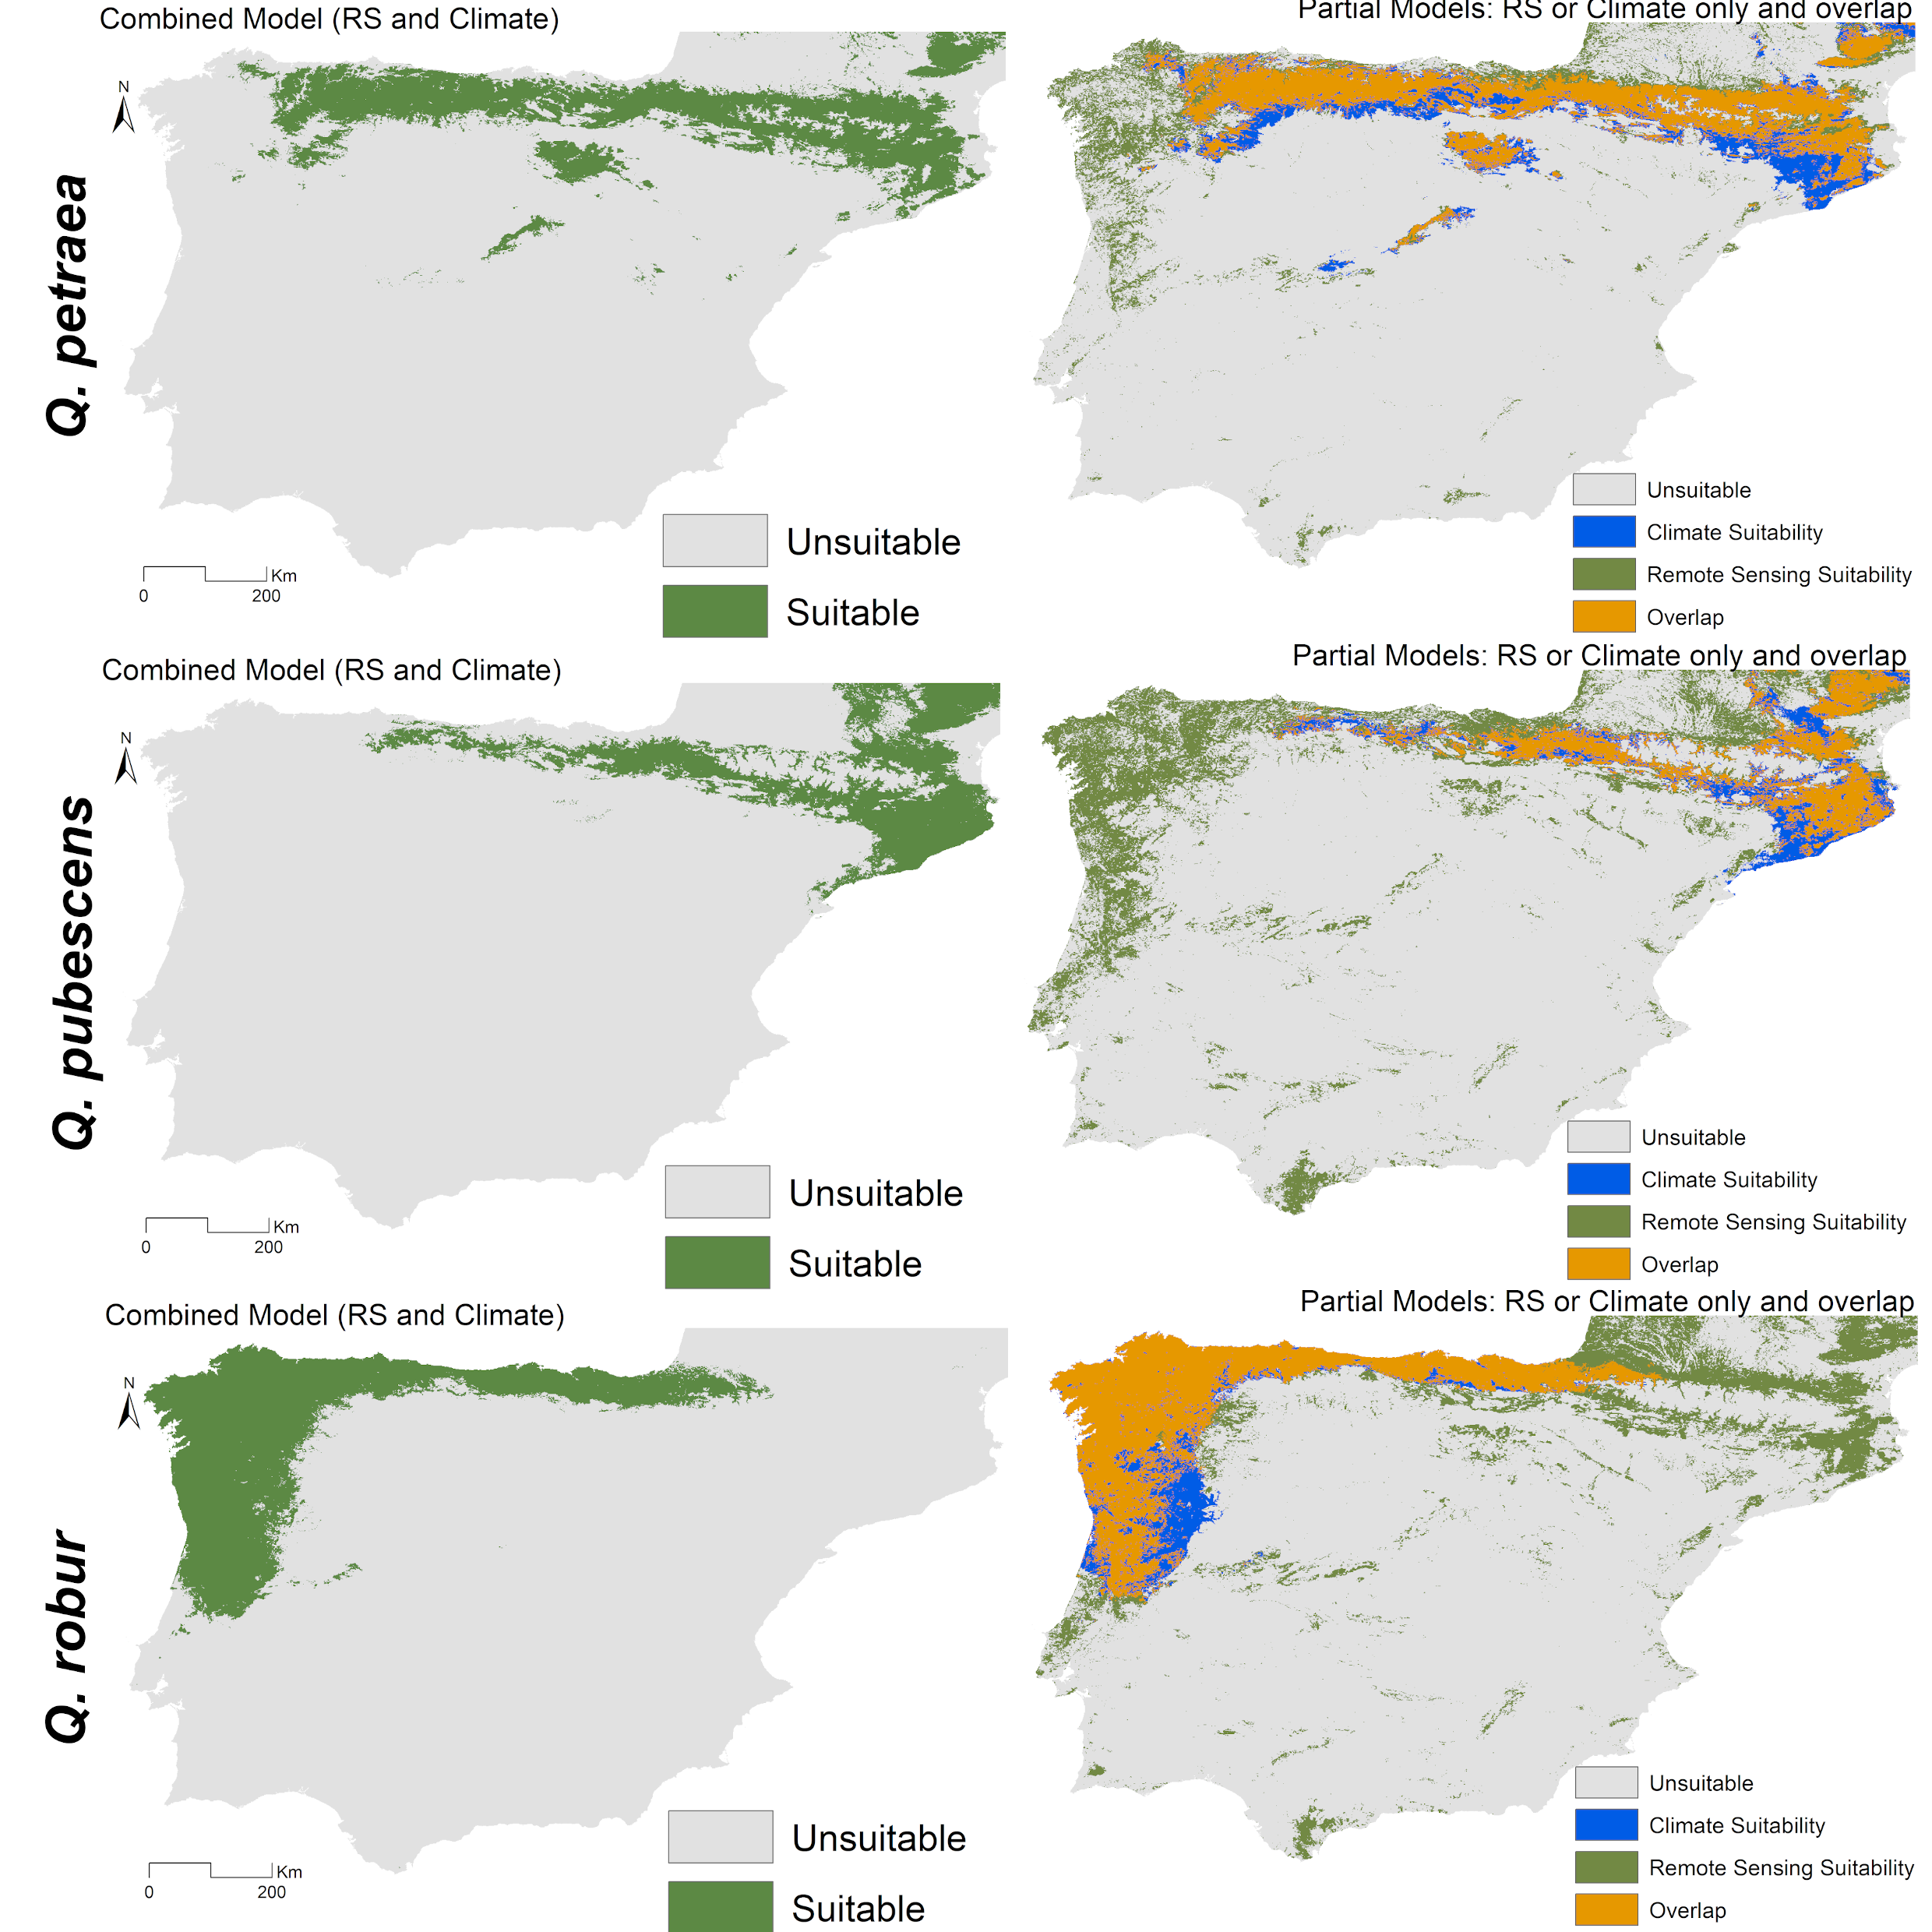

Supplement: s1 [file s1 › Appendix A/Figure A4.png]
